# Supplementary material for: Chiral 1,5-disubstituted 1,2,3-triazoles – versatile tools for foldamers and peptidomimetic applications
Source: Royal Society of Chemistry journal article supplement (doi:10.1039/d0ob00168f), 2020-01-01

## Supporting Information

### Chiral 1,5-disubstituted 1,2,3-triazoles – versatile tools for foldamers and peptidomimetic applications

Anna Said Stålsmeden,<sup>a</sup> Andrew J. Paterson,<sup>a</sup> Imola Cs. Szigyártó,<sup>b</sup> Linda Thunberg,<sup>c</sup>  
Johan R. Johansson,<sup>\*d</sup> Tamás Beke-Somfai,<sup>\*b</sup> and Nina Kann<sup>\*a</sup>

<sup>a</sup> Department of Chemistry and Chemical Engineering, Chalmers University of Technology, SE-41296 Göteborg, Sweden. E-mail: kann@chalmers.se.

<sup>b</sup> Research Centre for Natural Sciences, Hungarian Academy of Sciences, Magyar tudósok krt., H-1117 Budapest, Hungary. E-mail: beke-somfai.tamas@ttk.mta.hu.

<sup>c</sup> Early Product Development, Pharmaceutical Sciences, IMED Biotech Unit, AstraZeneca Gothenburg, Sweden.

<sup>d</sup> Medicinal Chemistry, Cardiovascular, Renal and Metabolism, IMED Biotech Unit, AstraZeneca Gothenburg, Sweden. E-mail: johan.x.johansson@astrazeneca.com.

### Table of contents

|                                                                             |         |
|-----------------------------------------------------------------------------|---------|
| <b>Table S1.</b> Computational data for ( <i>R</i> )- <b>6</b>              | S2-S3   |
| <b>Table S2.</b> Computational data for ( <i>S</i> )- <b>6</b>              | S4-S5   |
| <b>Table S3.</b> Computational data for ( <i>R</i> )- <b>5</b>              | S6-S7   |
| <b>Table S4.</b> Computational data for ( <i>S</i> )- <b>5</b>              | S8      |
| <b>Table S5.</b> Computational data for ( <i>R,R</i> )- <b>7</b>            | S9-S10  |
| <b>Table S6.</b> Computational data for ( <i>S,R</i> )- <b>7</b>            | S11-S12 |
| <b>Table S7.</b> Computational data for ( <i>R,S</i> )- <b>7</b>            | S13-S14 |
| <b>Table S8.</b> Computational data for ( <i>S,S</i> )- <b>7</b>            | S15-S16 |
| <b>Table S9.</b> $\Delta G$ values of investigated secondary structures.    | S17     |
| Determination of enantiomeric excess for monomers <b>5-8</b>                | S18-S24 |
| <sup>1</sup> H and <sup>13</sup> C NMR spectra for <b>2</b> and <b>5-11</b> | S25-S41 |

**Table S1.** Structural and energetic properties of (*R*)-**6** conformers obtained at the B3LYP/6-311++G(2d,2p), M06-2X/6-311++G(2d,2p) and  $\omega$ B97X-D/6-311++G(2d,2p) levels of theory.

| Conf. | Sec. struct.          | Method          | $\varphi$ | $\theta$ | $\zeta$ | $\rho$ | $\psi$ | Rel. En.<br>(kcal.mol <sup>-1</sup> ) |
|-------|-----------------------|-----------------|-----------|----------|---------|--------|--------|---------------------------------------|
| 1     | H14                   | B3LYP           | -139,2    | 61,7     | -5,2    | -78,3  | -41,8  | 3,11                                  |
|       |                       | M06-2X          | -141,7    | 57,0     | -4,5    | -74,8  | -31,7  | 1,17                                  |
|       |                       | $\omega$ B97X-D | -138,8    | 57,6     | -4,6    | -74,2  | -31,5  | 1,20                                  |
| 2     | C8                    | B3LYP           | 109,0     | 74,1     | -5,8    | -75,8  | -81,7  | 0,98                                  |
|       |                       | M06-2X          | 71,8      | 51,9     | -8,4    | -67,2  | -37,4  | 0,56                                  |
|       |                       | $\omega$ B97X-D | 77,6      | 59,8     | -7,0    | -69,3  | -49,0  | 0,51                                  |
| 3     | Turn                  | B3LYP           | -92,1     | 94,1     | 5,4     | 104,7  | 33,7   | 1,25                                  |
|       |                       | M06-2X          | -72,7     | 102,0    | 7,0     | 82,5   | 119,5  | 4,29                                  |
|       |                       | $\omega$ B97X-D | -77,6     | 99,9     | 6,6     | 99,7   | 40,3   | 2,65                                  |
| 4     | 2-Helix               | B3LYP           | 117,4     | -62,2    | 5,1     | 103,1  | 46,8   | 0,25                                  |
|       |                       | M06-2X          | 117,9     | -57,9    | 7,0     | 84,3   | 28,5   | 0,12                                  |
|       |                       | $\omega$ B97X-D | 117,6     | -60,7    | 6,3     | 94,2   | 35,8   | 0,19                                  |
| 6     | H8                    | B3LYP           | 116,7     | 167,5    | 2,0     | 108,5  | 29,8   | 2,52                                  |
|       |                       | M06-2X          | 70,1      | -154,7   | 1,0     | 74,6   | -1,1   | 2,85                                  |
|       |                       | $\omega$ B97X-D | 69,9      | -147,2   | 0,3     | 94,0   | -30,3  | 3,33                                  |
| 7     | Spiral<br>H16         | B3LYP           | -92,1     | 94,1     | 5,4     | 104,7  | 33,7   | 1,25                                  |
|       |                       | M06-2X          | -69,5     | 102,2    | 5,3     | 102,0  | 34,2   | 2,86                                  |
|       |                       | $\omega$ B97X-D | -76,4     | 100,4    | 6,5     | 99,5   | 40,4   | 2,65                                  |
| 8     | H10                   | B3LYP           | -113,1    | 76,8     | 3,0     | 75,0   | -116,9 | 1,47                                  |
|       |                       | M06-2X          | -114,2    | 75,7     | 5,6     | 72,4   | -122,8 | 2,19                                  |
|       |                       | $\omega$ B97X-D | -112,7    | 76,1     | 5,1     | 72,3   | -120,3 | 2,14                                  |
| 10    | H10<br>Turn2<br>Turn3 | B3LYP           | 109,1     | 74,1     | -5,8    | -75,7  | -81,7  | 0,98                                  |
|       |                       | M06-2X          | 80,3      | 84,9     | -1,2    | -55,6  | -64,8  | 2,22                                  |
|       |                       | $\omega$ B97X-D | 77,6      | 59,8     | -7,0    | -69,4  | -49,0  | 0,51                                  |
| 11    | H14                   | B3LYP           | -71,4     | 146,9    | 5,2     | -73,7  | 2,5    | 2,99                                  |
|       |                       | M06-2X          | -69,3     | 151,1    | 3,2     | -68,2  | -7,1   | 2,33                                  |
|       |                       | $\omega$ B97X-D | -68,6     | 148,5    | 5,3     | -70,8  | -2,2   | 2,38                                  |
| 13    |                       | B3LYP           | -92,1     | 94,1     | 5,5     | 104,7  | 33,8   | 1,25                                  |
|       |                       | M06-2X          | -131,0    | 39,5     | -10,0   | 57,5   | 27,6   | 3,44                                  |
|       |                       | $\omega$ B97X-D | -132,1    | 40,7     | -10,4   | 60,8   | 25,5   | 4,18                                  |
| 20    |                       | B3LYP           | 88,9      | 83,9     | 2,0     | 109,7  | 33,4   | 2,29                                  |
|       |                       | M06-2X          | 78,1      | 75,2     | 4,1     | 74,7   | 33,5   | 4,66                                  |
|       |                       | $\omega$ B97X-D | 78,9      | 75,3     | 2,6     | 106,6  | 36,3   | 4,20                                  |
| 21    |                       | B3LYP           | 111,9     | 164,3    | -4,7    | -70,9  | -78,8  | 3,57                                  |
|       |                       | M06-2X          | 88,5      | 164,8    | -6,6    | -69,8  | -62,3  | 5,39                                  |

|    |    |         |        |        |      |       |        |      |
|----|----|---------|--------|--------|------|-------|--------|------|
|    |    | ωB97X-D | 95,2   | 161,3  | -6,1 | -68,1 | -64,3  | 4,93 |
|    |    | B3LYP   | -113,9 | -170,9 | 0,9  | 110,1 | 34,2   | 2,16 |
| 22 |    | M06-2X  | -87,9  | -175,7 | 6,0  | 87,6  | 31,1   | 4,98 |
|    |    | ωB97X-D | -95,6  | -175,2 | 4,5  | 95,7  | 38,7   | 4,54 |
|    |    | B3LYP   | 161,0  | 155,4  | 0,2  | 61,2  | -150,5 | 7,54 |
| 23 |    | M06-2X  | 174,6  | 153,6  | -1,3 | 51,6  | -147,9 | 8,85 |
|    |    | ωB97X-D | 175,9  | 151,2  | -1,0 | 56,8  | -149,2 | 9,39 |
|    |    | B3LYP   | -107,1 | -73,5  | 6,1  | 86,8  | 65,4   | 0,00 |
| 2' | C8 | M06-2X  | -67,5  | -56,4  | 9,5  | 74,9  | 31,1   | 0,00 |
|    |    | ωB97X-D | -72,6  | -63,5  | 6,7  | 78,1  | 42,9   | 0,00 |

**Table S2.** Structural and energetic properties of (*S*)-**6** conformers obtained at the B3LYP/6-311++G(2d,2p), M06-2X/6-311++G(2d,2p) and  $\omega$ B97X-D/6-311++G(2d,2p) levels of theory.

| Conf. | Sec. struct. | Method          | $\varphi$ | $\theta$ | $\zeta$ | $\rho$ | $\psi$ | Rel. En.<br>(kcal.mol <sup>-1</sup> ) |
|-------|--------------|-----------------|-----------|----------|---------|--------|--------|---------------------------------------|
| 1     | H14          | B3LYP           | -117,5    | 62,1     | -5,2    | -102,8 | -46,2  | 0,26                                  |
|       |              | M06-2X          | -117,9    | 57,9     | -7,2    | -84,4  | -30,3  | 0,11                                  |
|       |              | $\omega$ B97X-D | -117,6    | 60,7     | -6,3    | -94,2  | -35,8  | 0,19                                  |
| 2     | C8           | B3LYP           | 107,1     | 73,5     | -6,1    | -86,8  | -65,4  | 0,00                                  |
|       |              | M06-2X          | 67,6      | 56,4     | -9,5    | -74,9  | -31,1  | 0,00                                  |
|       |              | $\omega$ B97X-D | 72,6      | 63,5     | -6,7    | -78,1  | -42,9  | 0,00                                  |
| 3     | Turn         | B3LYP           | -87,9     | 138,6    | -2,4    | 62,5   | 86,6   | 4,92                                  |
|       |              | M06-2X          | -78,0     | 139,3    | -6,3    | 61,8   | 159,9  | 6,63                                  |
|       |              | $\omega$ B97X-D | -84,4     | 136,6    | -5,8    | 63,0   | 157,9  | 6,46                                  |
| 2'    | 2-Helix      | B3LYP           | -109,1    | -74,1    | 5,8     | 75,7   | 81,7   | 0,98                                  |
|       |              | M06-2X          | -71,8     | -51,9    | 8,4     | 67,2   | 37,4   | 0,56                                  |
|       |              | $\omega$ B97X-D | -77,6     | -59,8    | 7,0     | 69,3   | 49,0   | 0,51                                  |
| 6     | H8           | B3LYP           | 100,6     | 61,7     | -12,0   | 49,3   | 80,3   | 3,05                                  |
|       |              | M06-2X          | 79,4      | 63,5     | -9,7    | 44,7   | 65,3   | 3,29                                  |
|       |              | $\omega$ B97X-D | 84,8      | 60,7     | -10,3   | 47,4   | 66,2   | 3,19                                  |
| 7     | Spiral       | M06-2X          | -76,2     | 144,9    | -7,4    | 56,5   | 37,5   | 5,49                                  |
|       | H16          | $\omega$ B97X-D | -80,2     | 143,9    | -6,5    | 58,4   | 37,6   | 5,33                                  |
| 8     | H10          | B3LYP           | -118,0    | 91,2     | 0,2     | 56,2   | -110,0 | 4,65                                  |
|       |              | M06-2X          | -122,0    | 89,5     | 1,2     | 51,8   | -127,5 | 4,71                                  |
|       |              | $\omega$ B97X-D | -119,6    | 90,9     | 1,5     | 53,5   | -118,1 | 4,10                                  |
| 10    | Turn2        | M06-2X          | -70,1     | 154,7    | -1,0    | -74,6  | 1,1    | 2,85                                  |
|       | Turn3        | $\omega$ B97X-D | -68,9     | 147,6    | 0,1     | -92,7  | 28,3   | 3,35                                  |
| 11    | H14          | B3LYP           | -139,7    | 53,8     | -16,2   | 51,4   | 40,8   | 5,93                                  |
|       |              | M06-2X          | -136,8    | 48,6     | -13,3   | 47,7   | 38,6   | 3,34                                  |
|       |              | $\omega$ B97X-D | -136,2    | 49,3     | -15,1   | 51,0   | 37,3   | 3,81                                  |
| 13    | H10          | B3LYP           | -76,0     | 111,2    | 4,4     | -130,7 | 67,8   | 2,44                                  |
|       |              | M06-2X          | -66,3     | 108,1    | 6,3     | -139,8 | 63,0   | 3,37                                  |
|       |              | $\omega$ B97X-D | -70,0     | 110,3    | 4,9     | -135,0 | 62,3   | 3,46                                  |
| 14    |              | B3LYP           | 86,4      | 97,8     | 4,6     | 66,1   | 68,7   | 3,74                                  |
|       |              | M06-2X          | 75,3      | 93,5     | 6,2     | 65,9   | 54,5   | 4,74                                  |
|       |              | $\omega$ B97X-D | 79,2      | 92,4     | 6,2     | 66,1   | 61,4   | 4,39                                  |
| 20    |              | B3LYP           | 114,0     | 170,9    | -0,9    | -110,1 | -34,2  | 2,16                                  |
|       |              | M06-2X          |           |          |         |        |        |                                       |

|     |         |        |        |      |        |       |      |
|-----|---------|--------|--------|------|--------|-------|------|
|     | ωB97X-D | 95,6   | 175,2  | -4,5 | -95,7  | -38,7 | 4,54 |
| 21  | B3LYP   | -116,7 | -167,6 | -2,0 | -108,5 | -29,8 | 2,52 |
|     | M06-2X  | -70,1  | 154,7  | -1,0 | -74,6  | 1,1   | 2,85 |
|     | ωB97X-D |        |        |      |        |       |      |
| 10' | B3LYP   | 71,4   | -146,9 | -5,2 | 73,7   | -2,5  | 2,99 |
|     | M06-2X  | 69,3   | -151,1 | -3,2 | 68,2   | 7,1   | 2,33 |
|     | ωB97X-D | 68,6   | -148,5 | -5,2 | 70,8   | 2,2   | 2,38 |
|     | B3LYP   | -111,9 | -164,3 | 4,6  | 70,9   | 78,7  | 3,57 |
| 22  | M06-2X  | -88,5  | -164,8 | 6,6  | 69,8   | 62,3  | 5,39 |
|     | ωB97X-D | -95,0  | -160,8 | 6,3  | 68,3   | 68,0  | 4,88 |

**Table S3.** Structural and energetic properties of (*R*)-**5** conformers obtained at the B3LYP/6-311++G(2d,2p), M06-2X/6-311++G(2d,2p) and  $\omega$ B97X-D/6-311++G(2d,2p) levels of theory.

| Conf. | Sec. struct.  | Method          | $\varphi$ | $\theta$ | $\zeta$ | $\rho$ | $\psi$ | Rel. En.<br>(kcal.mol <sup>-1</sup> ) |
|-------|---------------|-----------------|-----------|----------|---------|--------|--------|---------------------------------------|
| 1     | H14           | B3LYP           | -101,2    | 51,8     | -10,8   | -95,8  | -46,4  | 4,83                                  |
|       |               | M06-2X          | -108,3    | 51,4     | -11,5   | -81,8  | -29,0  | 4,75                                  |
|       |               | $\omega$ B97X-D | -104,5    | 52,0     | -11,7   | -87,6  | -29,4  | 5,10                                  |
| 2     | C8            | B3LYP           | 122,7     | 64,4     | -8,5    | -83,4  | -72,1  | 0,00                                  |
|       |               | M06-2X          | 70,9      | 49,3     | -10,9   | -73,7  | -26,7  | 0,00                                  |
|       |               | $\omega$ B97X-D | 73,7      | 51,5     | -9,0    | -75,0  | -32,6  | 0,00                                  |
| 3     | Turn          | B3LYP           | -92,2     | 64,1     | -7,8    | -99,0  | -132,7 | 5,58                                  |
|       |               | M06-2X          | -90,7     | 66,8     | -7,9    | -79,5  | -174,5 | 5,48                                  |
|       |               | $\omega$ B97X-D | -92,2     | 64,5     | -7,7    | -82,6  | -173,1 | 5,82                                  |
| 4     | 2-Helix       | B3LYP           | -75,0     | 87,1     | 5,5     | 90,0   | 155,4  | 5,92                                  |
|       |               | M06-2X          | -67,5     | 94,4     | 4,9     | 76,3   | -172,0 | 7,78                                  |
|       |               | $\omega$ B97X-D | -72,7     | 90,3     | 5,3     | 79,6   | -176,7 | 7,47                                  |
| 6     | H8            | B3LYP           | 154,6     | -56,5    | 8,2     | 94,8   | 126,9  | 0,15                                  |
|       |               | M06-2X          | 154,6     | -57,6    | 5,7     | 97,3   | 129,8  | 1,85                                  |
|       |               | $\omega$ B97X-D | 150,8     | -56,3    | 6,9     | 95,3   | 132,2  | 1,58                                  |
| 7     | Spiral<br>H16 | B3LYP           | 115,6     |          | -3,2    | 73,4   | 78,4   | 1,34                                  |
|       |               | M06-2X          | 75,8      | 32,3     | -2,8    | 64,4   | 56,4   | 2,87                                  |
|       |               | $\omega$ B97X-D | 86,0      | 31,5     | -3,5    | 66,8   | 60,8   | 2,08                                  |
| 8     | H10           | B3LYP           | -69,1     | 92,7     | 3,8     | 91,9   | 33,5   | 4,40                                  |
|       |               | M06-2X          | -62,4     | 97,3     | 4,7     | 80,4   | 27,8   | 5,36                                  |
|       |               | $\omega$ B97X-D | -65,4     | 95,4     | 4,0     | 83,6   | 26,1   | 5,23                                  |
| 11    | H14           | B3LYP           | -59,6     | 134,3    | 0,7     | -86,5  | 8,8    | 5,85                                  |
|       |               | M06-2X          | -61,5     | 144,8    | -4,0    | -70,0  | -14,4  | 5,75                                  |
|       |               | $\omega$ B97X-D | -59,8     | 139,5    | -1,2    | -79,6  | 1,6    | 5,70                                  |
| 13    |               | B3LYP           | 151,6     | 66,0     | 3,0     | 100,4  | 33,7   | 2,98                                  |
|       |               | M06-2X          | 158,2     | 64,3     | 5,8     | 88,2   | 26,3   | 5,00                                  |
|       |               | $\omega$ B97X-D | 156,5     | 65,2     | 5,3     | 90,4   | 27,8   | 4,78                                  |
| 14    |               | B3LYP           | -61,1     | 99,2     | 4,3     | -135,7 | 58,6   | 6,84                                  |
|       |               | M06-2X          | -58,6     | 100,1    | 3,5     | -139,5 | 58,5   | 8,14                                  |
|       |               | $\omega$ B97X-D | -59,6     | 100,7    | 4,1     | -136,5 | 54,9   | 8,09                                  |
| 20    |               | B3LYP           | 84,4      | 55,7     | 0,3     | 94,2   | 42,3   | 2,15                                  |
|       |               | M06-2X          | 77,0      | 60,3     | 3,2     | 87,5   | 30,8   | 4,48                                  |
|       |               | $\omega$ B97X-D |           |          |         |        |        |                                       |
| 21    |               | B3LYP           | 92,6      | -157,4   | -1,0    | -100,7 | -40,4  | 1,43                                  |
|       |               | M06-2X          | 79,7      | -165,1   | -3,0    | -92,7  | -33,5  | 4,20                                  |

|     |         |       |        |      |       |       |      |
|-----|---------|-------|--------|------|-------|-------|------|
| 22  | B3LYP   | -65,0 | -64,0  | -2,4 | -87,8 | -40,9 | 3,67 |
|     | M06-2X  | -71,4 | -160,0 | -6,0 | -89,0 | -28,3 | 6,16 |
|     | ωB97X-D | -73,7 | -155,9 | -6,1 | -89,0 | -30,2 | 6,08 |
| 11' | B3LYP   | 69,3  | -144,0 | 0,3  | 85,9  | -17,2 | 0,48 |
|     | M06-2X  | 67,3  | -151,5 | 2,9  | 75,7  | -7,9  | 1,58 |
|     | ωB97X-D | 66,0  | -147,8 | 0,0  | 77,2  | -7,2  | 1,22 |
| 23  | B3LYP   | -68,7 | -78,3  | 4,4  | 81,2  | 66,0  | 1,98 |
|     | M06-2X  | -61,5 | -55,0  | 8,6  | 77,8  | 28,9  | 0,33 |
|     | ωB97X-D | -60,9 | -58,0  | 6,8  | 78,7  | 34,1  | 0,74 |

**Table S4.** Structural and energetic properties of (*S*)-**5** conformers obtained at the B3LYP/6-311++G(2d,2p), M06-2X/6-311++G(2d,2p) and  $\omega$ B97X-D/6-311++G(2d,2p) levels of theory.

| Conf. | Sec. struct.          | Method          | $\varphi$ | $\theta$ | $\zeta$ | $\rho$ | $\psi$ | Rel. En.<br>(kcal.mol <sup>-1</sup> ) |
|-------|-----------------------|-----------------|-----------|----------|---------|--------|--------|---------------------------------------|
| 1     | H14                   | B3LYP           | -122,4    | 60,0     | -5,8    | -99,5  | -38,6  | 0,00                                  |
|       |                       | M06-2X          | -119,4    | 55,6     | -7,6    | -84,7  | -27,3  | 0,00                                  |
|       |                       | $\omega$ B97X-D |           |          |         |        |        |                                       |
| 2     | C8                    | B3LYP           | 68,7      | 78,3     | -4,4    | -81,2  | -66,0  | 2,50                                  |
|       |                       | M06-2X          | 61,5      | 54,9     | -8,6    | -77,8  | -28,8  | 0,52                                  |
|       |                       | $\omega$ B97X-D | 60,9      | 58,0     | -6,8    | -78,7  | -34,1  | 0,74                                  |
| 3     | Turn                  | B3LYP           | -108,7    | 70,5     | -2,9    | -104,4 | -130,6 | 1,45                                  |
|       |                       | M06-2X          | -112,8    | 59,6     | -4,0    | -84,5  | 177,3  | 1,09                                  |
|       |                       | $\omega$ B97X-D | -114,9    | 60,3     | -4,0    | -84,5  | 178,5  | 1,29                                  |
| 4     | 2-Helix               | B3LYP           | -85,6     | 99,4     | 3,7     | 77,2   | 142,1  | 0,70                                  |
|       |                       | M06-2X          | -73,1     | 107,7    | 2,6     | 71,1   | 153,4  | 3,00                                  |
|       |                       | $\omega$ B97X-D | -80,5     | 102,0    | 3,4     | 74,2   | 149,2  | 2,46                                  |
| 6     | H8                    | B3LYP           | -122,6    | -64,4    | 8,5     | 83,4   | 72,0   | 0,52                                  |
|       |                       | M06-2X          | -154,3    | -58,5    | 13,1    | 87,9   | 71,6   | 2,66                                  |
|       |                       | $\omega$ B97X-D | -73,8     | -51,5    | 9,0     | 75,0   | 32,6   | 0,00                                  |
| 7     | Spiral<br>H16         | B3LYP           | 67,8      | 47,5     | -6,1    | 65,1   | 73,9   | 3,99                                  |
|       |                       | M06-2X          | 58,4      | 46,4     | -3,4    | 56,9   | 55,3   | 3,95                                  |
|       |                       | $\omega$ B97X-D | 60,9      | 45,9     | -4,0    | 60,6   | 60,6   | 3,75                                  |
| 8     | H10                   | B3LYP           | -84,3     | 101,5    | 5,8     | 93,1   | 36,7   | 0,92                                  |
|       |                       | M06-2X          |           |          |         |        |        |                                       |
|       |                       | $\omega$ B97X-D | -72,5     | 107,8    | 4,1     | 79,1   | 26,6   | 2,53                                  |
| 10    | H10<br>Turn2<br>Turn3 | B3LYP           | -110,7    | 80,6     | 3,1     | 69,5   | -125,3 | 0,87                                  |
|       |                       | M06-2X          | -111,8    | 76,5     | 6,9     | 66,9   | -134,1 | 2,50                                  |
|       |                       | $\omega$ B97X-D | -113,0    | 78,2     | 5,6     | 67,7   | -125,3 | 1,90                                  |
| 13    |                       | B3LYP           | -69,3     | 144,0    | -0,3    | -85,8  | 17,2   | 1,00                                  |
|       |                       | M06-2X          | -66,9     | 151,4    | -2,7    | -75,5  | 7,5    | 1,77                                  |
|       |                       | $\omega$ B97X-D | -66,6     | 147,9    | -0,3    | -77,0  | 7,1    | 1,45                                  |
| 14    |                       | B3LYP           | -143,2    | 73,3     | 4,6     | 108,7  | 25,7   | 1,43                                  |
|       |                       | M06-2X          | -136,2    | 40,8     | -10,6   | 57,0   | 27,0   | 2,38                                  |
|       |                       | $\omega$ B97X-D | -136,0    | 40,7     | -11,1   | 60,6   | 24,7   | 2,53                                  |
| 20    |                       | M06-2X          | -64,9     | 109,8    | 3,6     | -135,6 | 54,7   | 4,71                                  |
| 2'    |                       | M06-2X          | -70,9     | -49,3    | 10,9    | 73,7   | 26,8   | 0,19                                  |



**Table S5.** Structural and energetic properties of (*R,R*)-**7** conformers obtained at the B3LYP/6-311++G(2d,2p), M06-2X/6-311++G(2d,2p) and  $\omega$ B97X-D/6-311++G(2d,2p) levels of theory.

| Conf. | Sec. struct.          | Method          | $\varphi$ | $\theta$ | $\zeta$ | $\rho$ | $\psi$ | Rel. En.<br>(kcal.mol <sup>-1</sup> ) |
|-------|-----------------------|-----------------|-----------|----------|---------|--------|--------|---------------------------------------|
| 1     | H14                   | B3LYP           | 143,8     | 56,6     | -14,5   | -74,6  | -83,5  | 3,57                                  |
|       |                       | M06-2X          | -139,6    | 47,4     | -8,9    | -70,9  | -28,5  | 7,70                                  |
|       |                       | $\omega$ B97X-D | 143,7     | 54,3     | -14,8   | -72,4  | -69,6  | 3,89                                  |
| 2     | C8                    | M06-2X          | 78,8      | 40,9     | -7,8    | -66,1  | -34,3  | 2,10                                  |
|       |                       | $\omega$ B97X-D | 81,6      | 42,1     | -7,0    | -66,1  | -37,1  | 2,13                                  |
| 4     | 2-Helix               | B3LYP           | -100,4    | 64,3     | -1,1    | 85,7   | -130,7 | 7,77                                  |
|       |                       | M06-2X          | -105,0    | 63,4     | 1,7     | 80,6   | -140,5 | 7,86                                  |
|       |                       | $\omega$ B97X-D | -101,9    | 63,8     | 1,0     | 81,5   | -134,9 | 7,71                                  |
| 6     | H8                    | B3LYP           | 124,3     | -62,3    | 3,8     | 104,0  | 43,1   | 0,00                                  |
|       |                       | M06-2X          | 122,1     | -58,0    | 6,4     | 86,6   | 29,5   | 0,00                                  |
|       |                       | $\omega$ B97X-D | 124,0     | -60,3    | 6,2     | 92,9   | 31,1   | 0,00                                  |
| 7     | Spiral                | B3LYP           | 112,7     | 25,5     | -3,1    | 73,3   | 65,6   | 3,46                                  |
|       |                       | M06-2X          | 76,4      | 32,5     | -2,7    | 63,8   | 53,6   | 3,84                                  |
|       |                       | $\omega$ B97X-D | 86,4      | 32,7     | -3,6    | 65,9   | 55,3   | 3,27                                  |
| 8     | H10                   | B3LYP           | -68,1     | 92,2     | 3,3     | 99,9   | 35,6   | 5,25                                  |
|       |                       | M06-2X          | -60,5     | 96,9     | 5,0     | 88,6   | 29,3   | 5,82                                  |
|       |                       | $\omega$ B97X-D | -63,8     | 94,6     | 4,8     | 91,6   | 33,3   | 5,77                                  |
| 10    | H10<br>Turn2<br>Turn3 | M06-2X          | -70,8     | 92,9     | 5,4     | 74,8   | -162,7 | 9,40                                  |
| 11    | H14                   | B3LYP           | 143,8     | 56,7     | -14,5   | -74,6  | -83,5  | 3,57                                  |
|       |                       | M06-2X          | 150,4     | 82,0     | 9,2     | -51,6  | 152,0  | 7,49                                  |
|       |                       | $\omega$ B97X-D | 89,6      | 68,9     | 0,1     | -51,9  | -68,3  | 4,70                                  |
| 13    |                       | B3LYP           | -61,6     | 138,5    | 6,4     | -66,3  | -21,9  | 10,05                                 |
|       |                       | M06-2X          | -62,7     | 147,7    | -0,1    | -62,2  | -24,2  | 7,71                                  |
|       |                       | $\omega$ B97X-D | -61,3     | 142,8    | 4,6     | -64,5  | -23,5  | 8,21                                  |
| 14    |                       | B3LYP           | 150,7     | 65,0     | 0,1     | 107,4  | 33,1   | 3,57                                  |
|       |                       | M06-2X          | 157,9     | 62,9     | 5,0     | 91,0   | 27,2   | 5,16                                  |
|       |                       | $\omega$ B97X-D | 157,4     | 63,2     | 3,2     | 96,2   | 32,8   | 5,00                                  |
| 20    |                       | B3LYP           | -66,8     | 99,2     | 1,7     | -115,9 | 48,0   | 15,94                                 |
|       |                       | M06-2X          | -61,9     | 101,1    | 2,5     | -121,1 | 42,3   | 16,65                                 |
|       |                       | $\omega$ B97X-D | -63,0     | 100,6    | 2,2     | -119,7 | 46,3   | 16,40                                 |
| 21    |                       | B3LYP           | 86,0      | 58,5     | -0,9    | 104,1  | 39,3   | 2,76                                  |
|       |                       | M06-2X          | 76,6      | 60,7     | 2,1     | 90,5   | 33,1   | 4,54                                  |

|    |         |       |        |      |       |       |      |
|----|---------|-------|--------|------|-------|-------|------|
|    | ωB97X-D | 75,8  | 56,7   | 1,7  | 95,3  | 41,7  | 3,89 |
|    | B3LYP   | 91,5  | -158,3 | -3,3 | -85,4 | -60,9 | 4,36 |
| 22 | M06-2X  | 79,3  | -168,8 | -3,6 | -82,9 | -42,0 | 5,52 |
|    | ωB97X-D | 85,2  | -164,6 | -4,3 | -83,1 | -45,7 | 5,19 |
|    | B3LYP   | -67,4 | -100,7 | -2,3 | -65,3 | -69,8 | 5,99 |
| 7' | M06-2X  | -72,7 | -166,1 | -6,8 | -76,7 | -32,6 | 7,50 |
|    | ωB97X-D | -65,8 | -104,0 | 0,3  | -60,0 | -41,1 | 6,49 |
|    | B3LYP   | 88,8  | -158,5 | 3,5  | 108,6 | 27,7  | 2,65 |
| 23 | M06-2X  | 67,7  | -152,5 | 2,9  | 78,5  | -8,5  | 2,30 |
|    | ωB97X-D | 68,7  | -148,2 | 2,2  | 92,4  | -28,4 | 2,55 |
|    | B3LYP   | -68,3 | -73,6  | 4,9  | 86,4  | 56,0  | 2,94 |
| 24 | M06-2X  | -60,3 | -57,4  | 8,0  | 77,6  | 30,1  | 0,63 |
|    | ωB97X-D | -60,3 | -60,2  | 5,8  | 80,3  | 34,9  | 1,19 |

**Table S6.** Structural and energetic properties of (*S,R*)-**7** conformers obtained at the B3LYP/6-311++G(2d,2p) , M06-2X/6-311++G(2d,2p) and  $\omega$ B97X-D/6-311++G(2d,2p) levels of theory.

| <i>Conf.</i> | <i>Sec. struct.</i>   | <i>Method</i>   | $\varphi$ | $\theta$ | $\zeta$ | $\rho$ | $\psi$ | <i>Rel. En.</i><br>( <i>kcal.mol</i> <sup>-1</sup> ) |
|--------------|-----------------------|-----------------|-----------|----------|---------|--------|--------|------------------------------------------------------|
| 1            | H14                   | B3LYP           | -103,1    | 55,2     | -8,8    | -101,0 | -48,0  | 4,67                                                 |
|              |                       | M06-2X          | -109,7    | 53,1     | -11,0   | -82,7  | -28,8  | 4,65                                                 |
|              |                       | $\omega$ B97X-D | -105,7    | 55,8     | -10,6   | -93,4  | -37,6  | 4,88                                                 |
| 2            | C8                    | B3LYP           | 124,8     | 63,3     | -8,8    | -86,8  | -62,9  | 0,00                                                 |
|              |                       | M06-2X          | 71,2      | 50,4     | -10,7   | -74,0  | -26,6  | 0,00                                                 |
|              |                       | $\omega$ B97X-D | 73,6      | 54,0     | -8,3    | -76,5  | -34,3  | 0,00                                                 |
| 3            | Turn                  | B3LYP           | -102,5    | 77,8     | -5,2    | 61,0   | -128,0 | 12,05                                                |
|              |                       | M06-2X          | -126,9    | 78,9     | 7,5     | 67,9   | -157,7 | 13,02                                                |
|              |                       | $\omega$ B97X-D | -107,1    | 74,5     | -4,4    | 61,5   | -129,8 | 11,29                                                |
| 4            | 2-Helix               | B3LYP           | 159,4     | -62,7    | 9,6     | 85,6   | 128,5  | 2,18                                                 |
|              |                       | M06-2X          | 154,6     | -63,1    | 5,4     | 88,7   | 138,1  | 3,31                                                 |
|              |                       | $\omega$ B97X-D | 155,1     | -61,1    | 6,5     | 86,9   | 139,2  | 2,61                                                 |
| 6            | H8                    | B3LYP           | 114,3     | 45,3     | -14,1   | 58,0   | 81,2   | 3,40                                                 |
|              |                       | M06-2X          | 86,3      | 45,9     | -10,9   | 54,3   | 67,1   | 4,57                                                 |
|              |                       | $\omega$ B97X-D | 99,8      | 45,3     | -12,6   | 56,2   | 68,6   | 3,64                                                 |
| 7            | Spiral<br>H16         | B3LYP           | -102,5    | 77,8     | -5,2    | 60,9   | -128,0 | 12,05                                                |
|              |                       | M06-2X          | -109,1    | 73,6     | -3,7    | 60,1   | -133,9 | 11,89                                                |
|              |                       | $\omega$ B97X-D | -107,1    | 74,5     | -4,4    | 61,5   | -129,8 | 11,29                                                |
| 8            | H10                   | B3LYP           | -63,4     | 99,0     | 5,3     | -136,4 | 65,6   | 5,85                                                 |
|              |                       | M06-2X          | -60,0     | 101,4    | 5,8     | -139,8 | 60,8   | 6,86                                                 |
|              |                       | $\omega$ B97X-D | -60,1     | 100,1    | 5,8     | -139,0 | 63,1   | 6,66                                                 |
| 10           | H10<br>Turn2<br>Turn3 | B3LYP           | 90,3      | -154,1   | 1,8     | -112,0 | -37,3  | 0,80                                                 |
|              |                       | M06-2X          | 79,1      | -165,1   | -2,4    | -94,4  | -34,7  | 3,68                                                 |
|              |                       | $\omega$ B97X-D | 82,7      | -161,7   | -1,8    | -98,6  | -41,4  | 2,98                                                 |
| 11           | H14                   | B3LYP           | -64,7     | -65,6    | -0,3    | -104,4 | -36,7  | 3,35                                                 |
|              |                       | M06-2X          | -70,5     | -159,6   | -6,7    | -89,3  | -27,6  | 5,98                                                 |
|              |                       | $\omega$ B97X-D | -73,1     | -154,6   | -4,9    | -93,7  | -33,0  | 5,82                                                 |
| 13           |                       | B3LYP           | 73,8      | -141,4   | 0,5     | 62,0   | 58,8   | 2,96                                                 |
|              |                       | M06-2X          | 64,1      | -145,5   | -0,5    | 71,7   | -0,4   | 2,31                                                 |
|              |                       | $\omega$ B97X-D | 63,4      | -143,3   | -2,5    | 73,6   | -4,0   | 1,85                                                 |
| 14           |                       | B3LYP           | 98,2      | 74,1     | 5,0     | 77,2   | 46,2   | 5,40                                                 |
|              |                       | M06-2X          | 150,3     | 74,8     | 6,0     | 71,8   | 32,6   | 6,30                                                 |
|              |                       | $\omega$ B97X-D | 146,6     | 76,3     | 4,9     | 72,9   | 32,4   | 5,81                                                 |
| 2'           |                       | B3LYP           | -69,6     | -90,2    | 0,9     | 65,3   | 86,7   | 3,31                                                 |
|              |                       | M06-2X          | -63,6     | -52,5    | 6,8     | 71,7   | 36,5   | 1,13                                                 |

|    |         |       |       |     |      |      |      |
|----|---------|-------|-------|-----|------|------|------|
|    | ωB97X-D | -62,9 | -56,3 | 6,4 | 71,6 | 41,0 | 1,58 |
| 21 | M06-2X  | -66,6 | -88,8 | 1,8 | 54,8 | 65,8 | 3,78 |

**Table S7.** Structural and energetic properties of (*R,S*)-7 conformers obtained at the B3LYP/6-311++G(2d,2p), M06-2X/6-311++G(2d,2p) and  $\omega$ B97X-D/6-311++G(2d,2p) levels of theory.

| Conf. | Sec. struct.   | Method          | $\varphi$ | $\theta$ | $\zeta$ | $\rho$ | $\psi$ | Rel. En.<br>(kcal.mol <sup>-1</sup> ) |
|-------|----------------|-----------------|-----------|----------|---------|--------|--------|---------------------------------------|
| 1     | H14            | B3LYP           | -144,6    | 61,0     | -4,8    | -79,6  | -40,0  | 2,00                                  |
|       |                | M06-2X          | -147,6    | 56,2     | -4,6    | -75,9  | -30,7  | 0,24                                  |
|       |                | $\omega$ B97X-D | -145,0    | 57,1     | -4,7    | -75,9  | -29,3  | 0,41                                  |
| 2     | C8             | B3LYP           | 69,6      | 90,2     | -0,9    | -65,3  | -86,7  | 3,31                                  |
|       |                | M06-2X          | 63,6      | 52,5     | -6,8    | -71,7  | -36,5  | 1,13                                  |
|       |                | $\omega$ B97X-D | 62,9      | 56,3     | -6,3    | -71,6  | -41,0  | 1,58                                  |
| 3     | Turn           | B3LYP           | -159,4    | 62,7     | -9,6    | -85,6  | -128,5 | 2,18                                  |
|       |                | M06-2X          | -154,6    | 63,1     | -5,4    | -88,7  | -138,1 | 3,31                                  |
|       |                | $\omega$ B97X-D |           |          |         |        |        |                                       |
| 4     | 2-Helix        | B3LYP           | -80,9     | 103,4    | 4,1     | 102,2  | 37,1   | 0,06                                  |
|       |                | M06-2X          | -70,1     | 105,5    | 5,9     | 79,1   | 125,5  | 3,19                                  |
|       |                | $\omega$ B97X-D | -77,6     | 102,5    | 4,4     | 81,2   | 125,2  | 3,23                                  |
| 6     | H8             | M06-2X          | -155,5    | -59,2    | 11,8    | 91,2   | 71,6   | 2,12                                  |
| 7     | Spiral         | B3LYP           | 64,7      | 65,6     | 0,3     | 104,4  | 36,7   | 3,35                                  |
|       |                | M06-2X          | 58,3      | 48,0     | -4,5    | 56,0   | 52,1   | 4,02                                  |
|       |                | $\omega$ B97X-D | 60,5      | 48,4     | -5,3    | 59,1   | 53,0   | 4,21                                  |
| 8     | H10            | B3LYP           | -80,9     | 103,3    | 4,1     | 102,2  | 37,1   | 0,06                                  |
|       |                | M06-2X          | -67,6     | 103,0    | 5,2     | 99,4   | 34,6   | 2,48                                  |
|       |                | $\omega$ B97X-D | -74,4     | 101,9    | 6,4     | 98,6   | 38,6   | 2,07                                  |
| 10    | Turn2<br>Turn3 | H10 B3LYP       | -116,5    | 75,3     | 3,3     | 74,4   | -118,6 | 0,40                                  |
|       |                | M06-2X          | -118,3    | 73,1     | 6,1     | 72,2   | -124,4 | 1,78                                  |
|       |                |                 |           |          |         |        |        |                                       |
| 11    | H14            | M06-2X          | 66,6      | 88,8     | -1,8    | -54,8  | -65,7  | 3,78                                  |
| 13    |                | B3LYP           | -67,0     | 141,0    | 3,7     | -75,9  | 5,0    | 2,04                                  |
|       |                | M06-2X          | -64,1     | 145,5    | 0,5     | -71,7  | 0,3    | 2,31                                  |
|       |                | $\omega$ B97X-D | -62,5     | 143,0    | 2,8     | -73,6  | 3,7    | 1,87                                  |
| 14    |                | B3LYP           | -141,0    | 73,2     | 2,5     | 114,6  | 27,4   | 0,39                                  |
|       |                | M06-2X          | -137,6    | 41,7     | -11,1   | 56,3   | 28,6   | 2,82                                  |
|       |                | $\omega$ B97X-D | -138,0    | 42,4     | -11,2   | 58,9   | 27,3   | 3,55                                  |
| 21    |                | M06-2X          | 67,8      | 127,5    | 5,0     | 68,2   | 40,4   | 6,50                                  |

|    |     |         |        |       |      |       |       |      |
|----|-----|---------|--------|-------|------|-------|-------|------|
|    |     | ωB97X-D | 72,3   | 153,6 | 4,8  | 93,3  | 32,9  | 5,79 |
| 22 |     | B3LYP   | -73,8  | 141,4 | -0,5 | -62,0 | -58,8 | 2,96 |
| 23 |     | M06-2X  | -153,9 | 65,6  | 2,9  | 112,4 | 21,6  | 3,36 |
|    |     | ωB97X-D | -117,9 | 69,8  | 2,0  | 123,8 | 19,7  | 2,18 |
| 2' | C8M | B3LYP   | -124,8 | -63,2 | 8,8  | 86,8  | 62,9  | 0,00 |
|    |     | M06-2X  | -71,2  | -50,4 | 10,7 | 74,0  | 26,6  | 0,00 |
|    |     | ωB97X-D | -73,5  | -54,0 | 8,3  | 76,5  | 34,2  | 0,00 |

**Table S8.** Structural and energetic properties of (*S,S*)-7 conformers obtained at the B3LYP/6-311++G(2d,2p), M06-2X/6-311++G(2d,2p) and  $\omega$ B97X-D/6-311++G(2d,2p) levels of theory.

| Conf. | Sec. struct.          | Method                      | $\varphi$ | $\theta$ | $\zeta$ | $\rho$ | $\psi$ | Rel. En.<br>(kcal.mol <sup>-1</sup> ) |
|-------|-----------------------|-----------------------------|-----------|----------|---------|--------|--------|---------------------------------------|
| 1     | H14                   | B3LYP                       | -124,3    | 62,3     | -3,8    | -104,0 | -43,1  | 0,00                                  |
|       |                       | $\omega$ B97X-D             | -124,0    | 60,3     | -6,2    | -92,9  | -32,0  | 0,00                                  |
| 2     | C8                    | B3LYP                       | 68,3      | 73,6     | -4,9    | -86,4  | -55,9  | 2,94                                  |
|       |                       | M06-2X                      | 60,3      | 57,4     | -8,0    | -77,5  | -30,2  | 0,00                                  |
|       |                       | $\omega$ B97X-D             | 60,3      | 60,2     | -5,8    | -80,3  | -34,9  | 1,10                                  |
| 3     | Turn                  | B3LYP                       | -128,2    | 102,7    | 5,4     | 67,3   | 136,2  | 4,21                                  |
|       |                       | MOM06-2X<br>$\omega$ B97X-D | -135,0    | 96,6     | 4,7     | 66,0   | 157,4  | 5,47                                  |
| 4     | 2-Helix               | B3LYP                       | -143,9    | -56,6    | 14,5    | 74,6   | 83,5   | 3,57                                  |
|       |                       | M06-2X                      | -151,3    | -53,6    | 16,1    | 73,7   | 69,6   | 4,00                                  |
|       |                       | $\omega$ B97X-D             | -143,7    | -54,3    | 14,8    | 72,4   | 69,6   | 3,80                                  |
| 6     | H8                    | B3LYP                       | 69,4      | 63,5     | -10,6   | 48,0   | 77,2   | 6,09                                  |
|       |                       | M06-2X                      | 61,5      | 59,6     | -7,2    | 43,9   | 63,8   | 4,40                                  |
|       |                       | $\omega$ B97X-D             | 64,1      | 60,1     | -8,5    | 45,8   | 65,5   | 5,01                                  |
| 7     | Spiral<br>H16         | B3LYP                       | -116,7    | 96,3     | -1,1    | 52,6   | -117,3 | 4,40                                  |
|       |                       | M06-2X                      | -123,4    | 90,3     | 0,9     | 50,0   | -130,4 | 3,97                                  |
|       |                       | $\omega$ B97X-D             | -123,5    | 91,1     | 0,5     | 53,3   | -122,0 | 3,85                                  |
| 8     | H10                   | B3LYP                       | -73,2     | 128,8    | -0,4    | -117,2 | 55,9   | 1,73                                  |
|       |                       | M06-2X                      | -67,2     | 152,4    | -2,8    | -78,2  | 7,7    | 1,68                                  |
|       |                       | $\omega$ B97X-D             | -68,7     | 148,3    | -2,2    | -92,4  | 28,4   | 2,46                                  |
| 10    | H10<br>Turn2<br>Turn3 | B3LYP                       | -143,3    | 53,3     | -15,8   | 50,5   | 41,4   | 6,00                                  |
|       |                       | M06-2X                      | -140,9    | 48,1     | -12,8   | 46,8   | 39,1   | 2,57                                  |
|       |                       | $\omega$ B97X-D             | -141,6    | 49,8     | -14,2   | 48,9   | 38,1   | 3,70                                  |
| 11    | H14                   | M06-2X                      | -64,4     | 108,7    | 5,5     | -141,8 | 63,1   | 2,78                                  |
|       |                       | $\omega$ B97X-D             | -67,1     | 112,5    | 3,5     | -135,8 | 63,0   | 3,26                                  |
| 13    |                       | B3LYP                       | 67,4      | 100,7    | 2,3     | 65,3   | 69,8   | 5,99                                  |
|       |                       | M06-2X                      | 64,3      | 104,5    | 0,0     | 59,4   | 37,4   | 5,87                                  |
|       |                       | $\omega$ B97X-D             | 65,9      | 104,0    | -0,3    | 60,0   | 41,0   | 6,40                                  |
| 14    |                       | B3LYP                       | 68,3      | 73,6     | -4,9    | -86,4  | -56,0  | 2,94                                  |
|       |                       | M06-2X                      | 60,3      | 57,4     | -8,0    | -77,6  | -30,0  | 0,00                                  |
|       |                       | $\omega$ B97X-D             | 60,3      | 60,2     | -5,8    | -80,3  | -34,9  | 1,10                                  |
| 21    |                       | M06-2X                      | 72,7      | 166,2    | 6,7     | 76,7   | 32,6   | 6,87                                  |

|    |                 |       |       |      |      |      |      |
|----|-----------------|-------|-------|------|------|------|------|
| 22 | B3LYP           | -89,3 | 132,0 | -2,5 | 64,7 | 94,3 | 4,36 |
|    | M06-2X          | -72,5 | 139,8 | -4,2 | 58,5 | 61,5 | 4,33 |
|    | $\omega$ B97X-D | -77,8 | 139,5 | -4,9 | 59,6 | 59,0 | 4,48 |



**Table S9.** The  $\Delta G$  values, in kcal/mol, of the investigated secondary structures for hepta-homooligomers using all 8 possible substitution patterns. Values were obtained at the  $\omega$ B97X-D/6-31+G(d,p)// $\omega$ B97X-D/6-31G(d) level of theory using water as solvent. Values contain zero point and thermal corrections to the energy and entropy contributions within the harmonic approximation. Relative values were determined for each peptide using the average energy value of all secondary structures as reference point. Structures labelled with a '\*' in the table experienced unusually large energetic values and convergence problems due to steric clashes of the employed substitution pattern. For visual purposes these are displayed with higher than +30 kcal/mol relative energy on Figure 3 in the main paper.

|                        | (R)-5  | (R)-6  | (R,R)-7 | (R,S)-7 | (S)-5  | (S)-6  | (S,S)-7 | (S,R)-7 |
|------------------------|--------|--------|---------|---------|--------|--------|---------|---------|
| <b>H8<sub>p</sub></b>  | -4,68  | 11,86  | *       | *       | 15,32  | 6,65   | *       | *       |
| <b>H10<sub>p</sub></b> | -12,74 | -3,38  | -20,57  | 16,06   | 19,18  | 3,99   | 45,62   | -13,36  |
| <b>H14<sub>p</sub></b> | -14,81 | -11,06 | -25,43  | 14,49   | 10,75  | *      | 35,23   | -10,43  |
| <b>H16<sub>p</sub></b> | -25,20 | -19,62 | -34,85  | -6,75   | 12,19  | 11,55  | *       | *       |
| <b>H8<sub>M</sub></b>  | 15,32  | 6,65   | *       | *       | -4,68  | 11,87  | *       | *       |
| <b>H10<sub>M</sub></b> | 19,18  | 3,99   | 45,62   | -13,36  | -12,74 | -3,38  | -20,57  | 16,06   |
| <b>H14<sub>M</sub></b> | 10,75  | *      | 35,23   | -10,43  | -14,81 | -11,06 | -25,43  | 14,49   |
| <b>H16<sub>M</sub></b> | 12,19  | 11,55  | *       | *       | -25,20 | -19,62 | -34,85  | -6,75   |

## Determination of enantiomeric excess for compounds 5-8

(*R*)-5

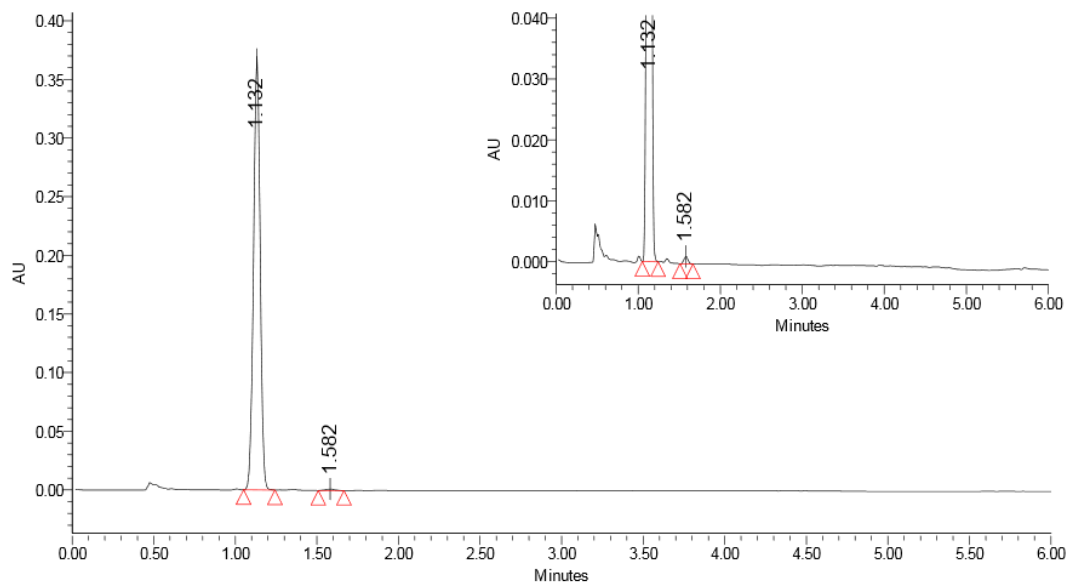

Column: Chiralpak IC (3  $\mu\text{m}$ , 150 $\times$ 4.6 mm), mobile phase: 25% ethanol in CO<sub>2</sub>, back pressure: 120 bar, temperature: 40 °C, flow rate: 3.5 ml/min and wavelength: 220 nm. Enantiomeric excess: 99.1%.

(*S*)-5

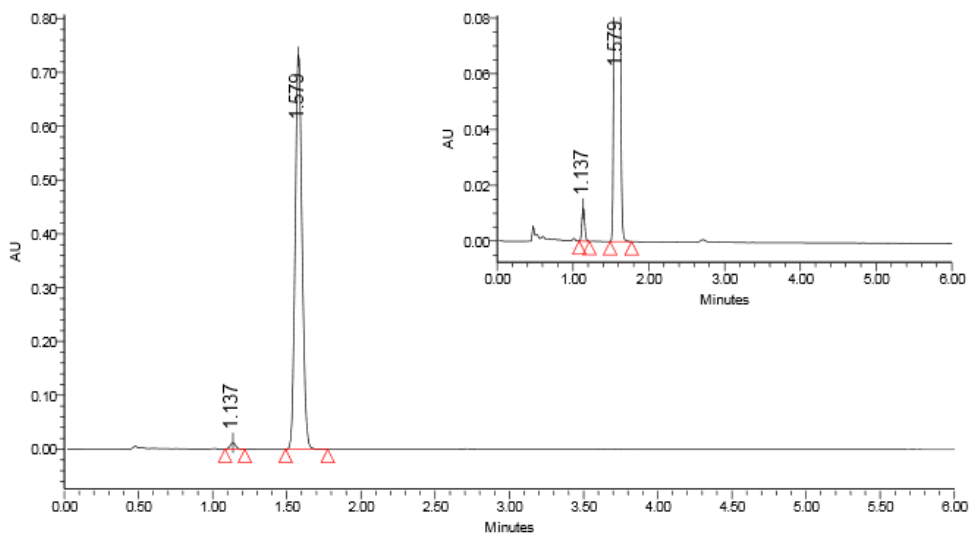

Column: Chiralpak IC (3  $\mu\text{m}$ , 150 $\times$ 4.6 mm), mobile phase: 25% ethanol in CO<sub>2</sub>, back pressure: 120 bar, temperature: 40 °C, flow rate: 3.5 ml/min and wavelength: 220 nm. Enantiomeric excess: 98.4%.

(R)-6

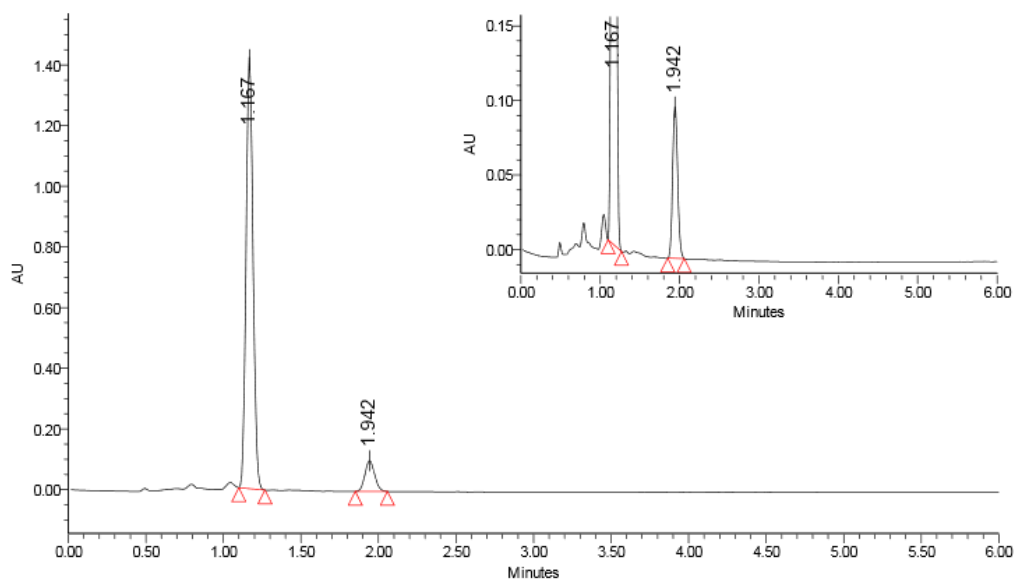

Column: Chiralpak IC (3  $\mu\text{m}$ , 150 $\times$ 4.6 mm), mobile phase: 25% ethanol in CO<sub>2</sub>, back pressure: 120 bar, temperature: 40 °C, flow rate: 3.5 ml/min and wavelength: 220 nm. Enantiomeric excess: 81.8%.

(S)-6

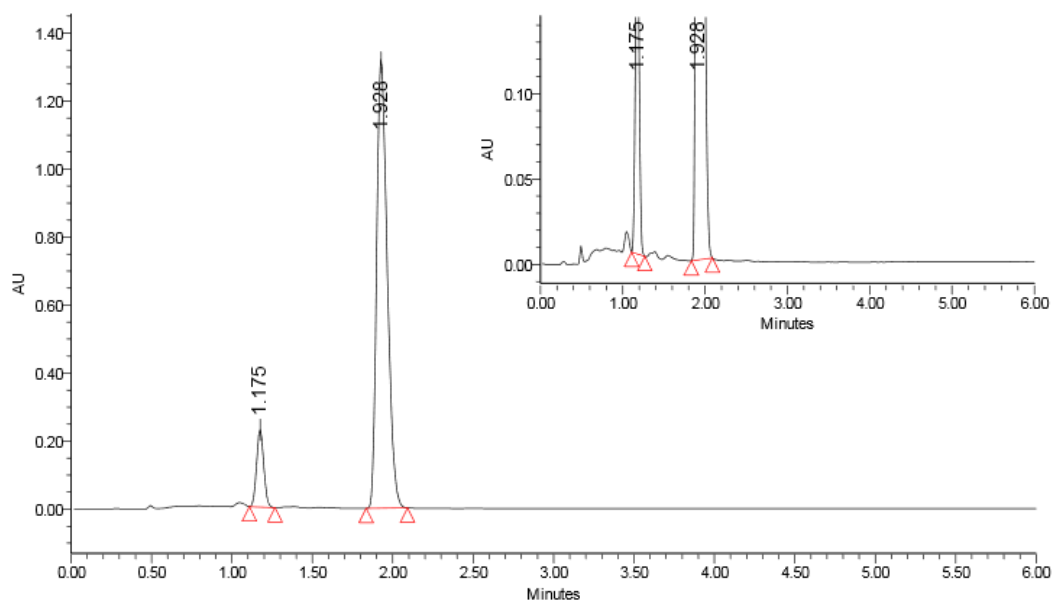

Column: Chiralpak IC (3  $\mu\text{m}$ , 150 $\times$ 4.6 mm), mobile phase: 25% ethanol in CO<sub>2</sub>, back pressure: 120 bar, temperature: 40 °C, flow rate: 3.5 ml/min and wavelength: 220 nm. Enantiomeric excess: 79.2%.

(*S,R*)-7 (peak 1)

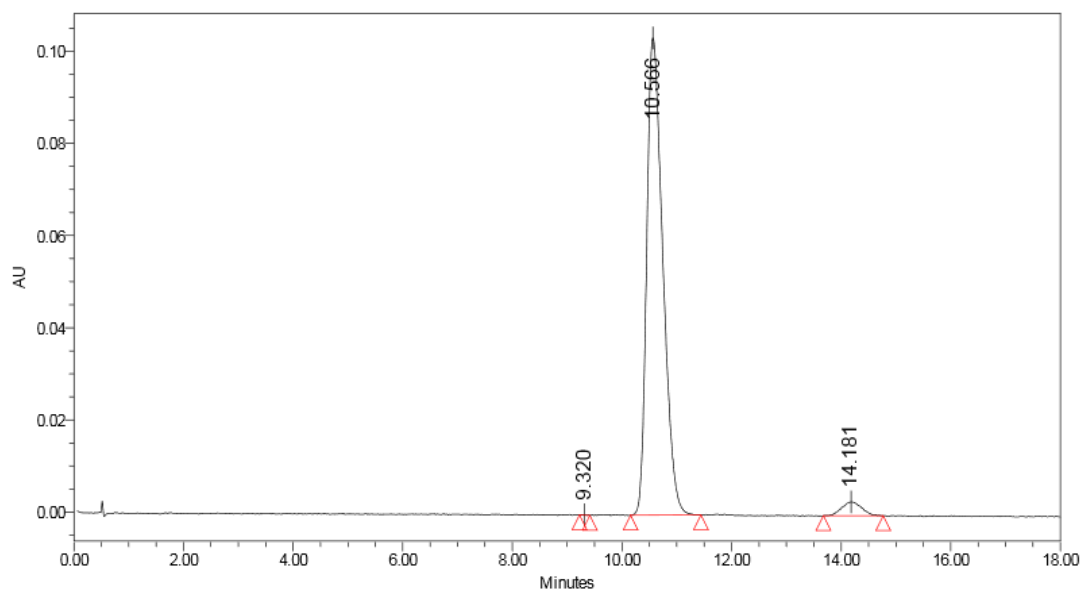

Column: Lux Cellulose-5 (3  $\mu\text{m}$ , 150 $\times$ 4.6 mm), mobile phase: 5% ethanol in CO<sub>2</sub>, back pressure: 120 bar, temperature: 40  $^{\circ}\text{C}$ , flow rate: 3.5 ml/min and wavelength: 220 nm. Diastereomeric ratio: 96/4. Enantiomeric excess: >99%.

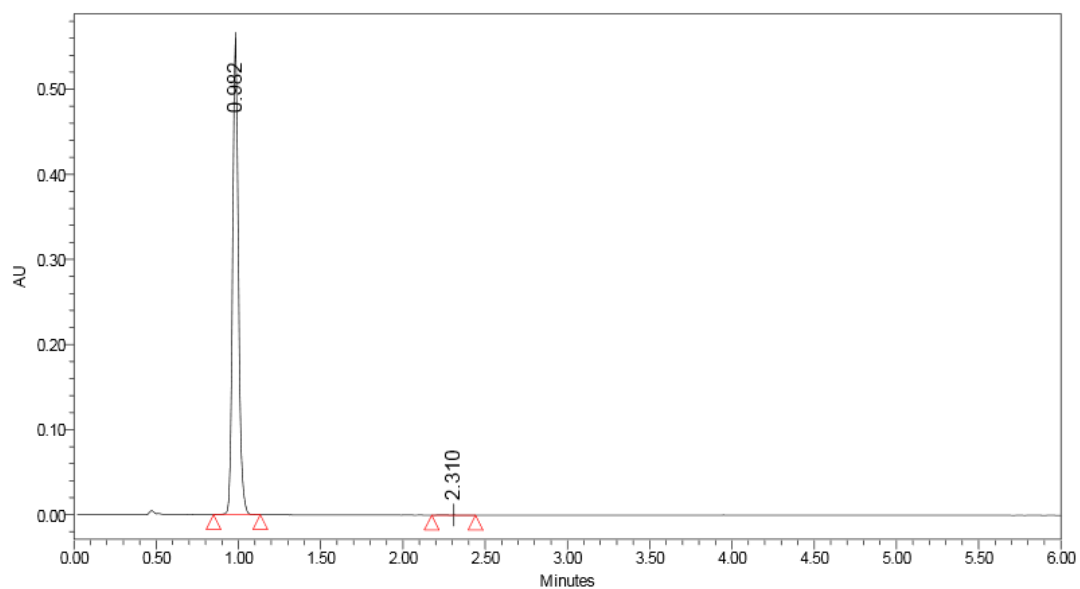

Column: Lux Cellulose-5 (3  $\mu\text{m}$ , 150 $\times$ 4.6 mm), mobile phase: 25% ethanol in CO<sub>2</sub>, back pressure: 120 bar, temperature: 40  $^{\circ}\text{C}$ , flow rate: 3.5 ml/min and wavelength: 220 nm.

(*R,S*)-7 (peak 2)

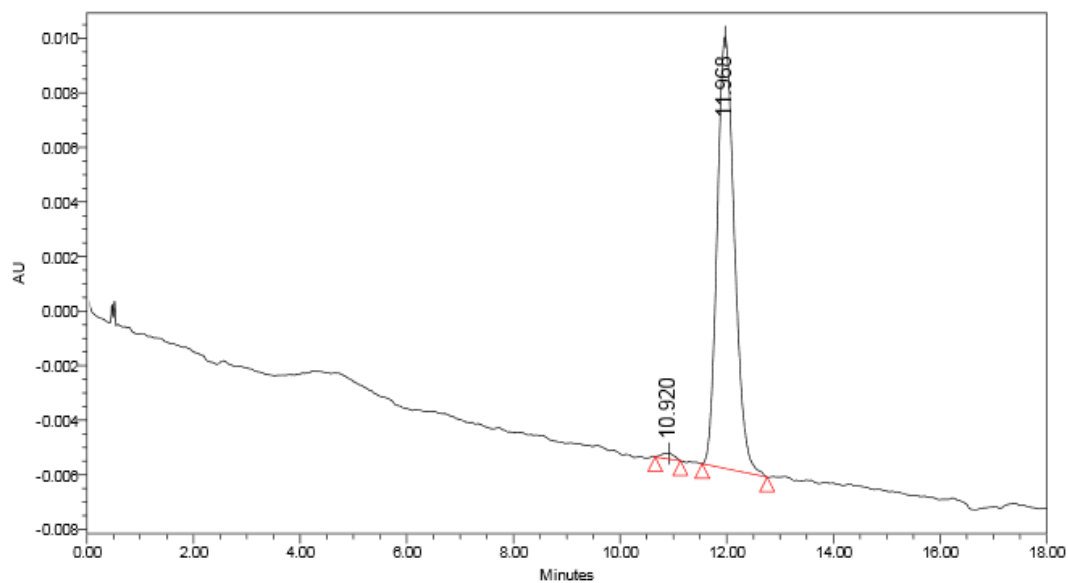

Column: Lux Cellulose-5 (3  $\mu$ m, 150 $\times$ 4.6 mm), mobile phase: 5% ethanol in CO<sub>2</sub>, back pressure: 120 bar, temperature: 40  $^{\circ}$ C, flow rate: 3.5 ml/min and wavelength: 220 nm. Enantiomeric excess: >99%.

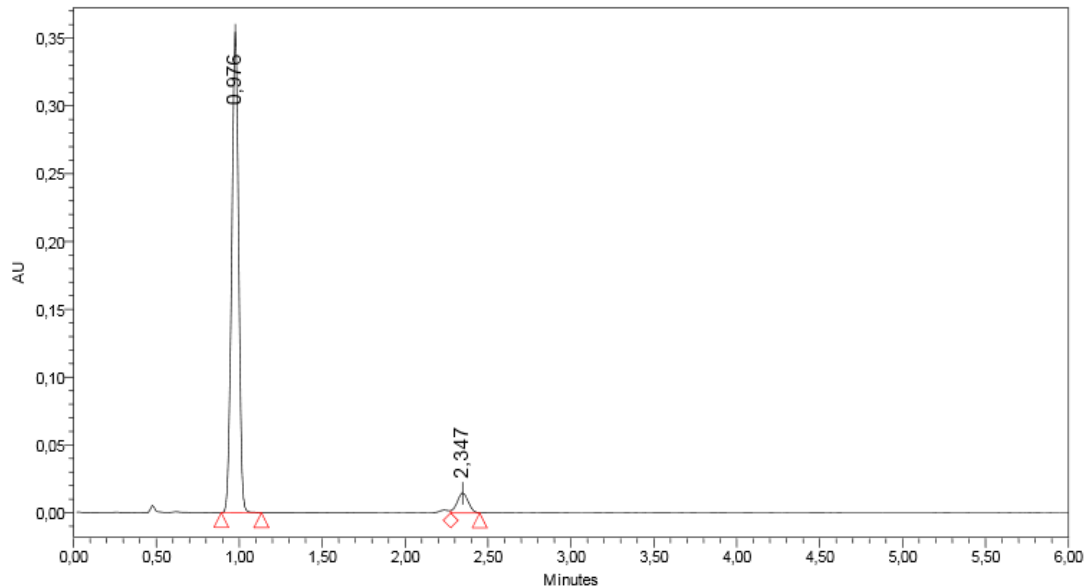

Column: Lux Cellulose-5 (3  $\mu$ m, 150 $\times$ 4.6 mm), mobile phase: 25% ethanol in CO<sub>2</sub>, back pressure: 120 bar, temperature: 40  $^{\circ}$ C, flow rate: 3.5 ml/min and wavelength: 220 nm. Diastereomeric ratio: 93/7.

(*R,R*)-7 (peak 3)

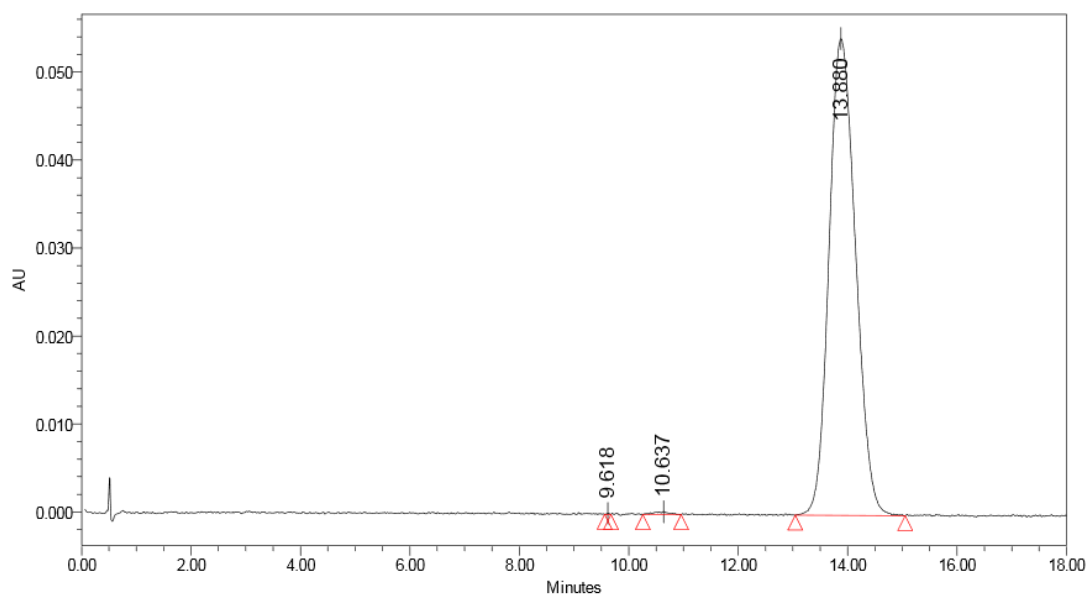

Column: Lux Cellulose-5 (3  $\mu\text{m}$ , 150 $\times$ 4.6 mm), mobile phase: 5% ethanol in CO<sub>2</sub>, back pressure: 120 bar, temperature: 40 °C, flow rate: 3.5 ml/min and wavelength: 220 nm. Diastereomeric ratio: >99/1.

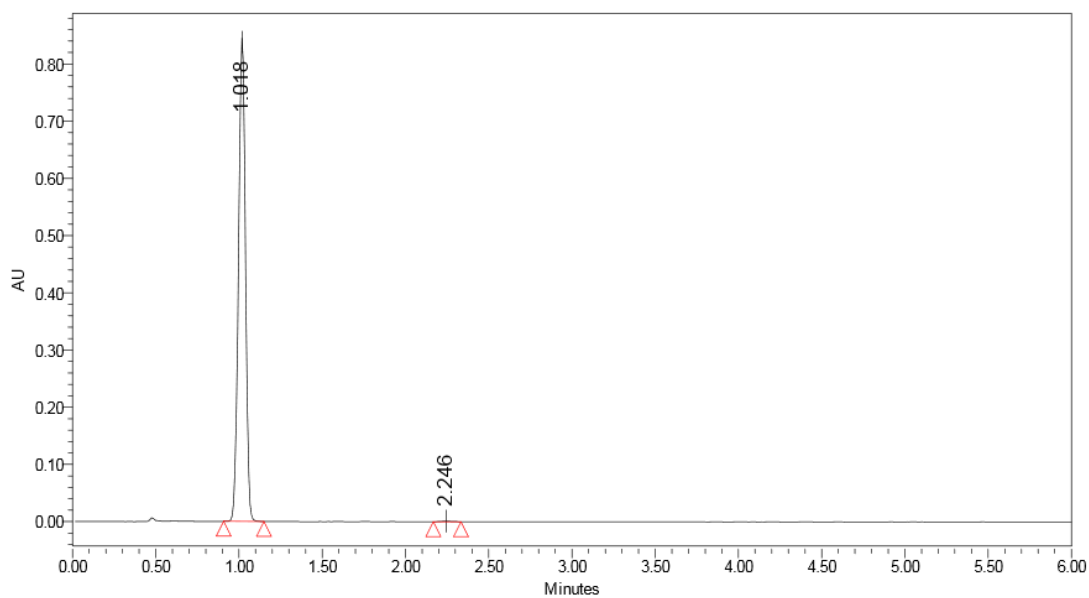

Column: Lux Cellulose-5 (3  $\mu\text{m}$ , 150 $\times$ 4.6 mm), mobile phase: 25% ethanol in CO<sub>2</sub>, back pressure: 120 bar, temperature: 40 °C, flow rate: 3.5 ml/min and wavelength: 220 nm. Enantiomeric excess: >99%.

(*S,S*)-7 (peak 4)

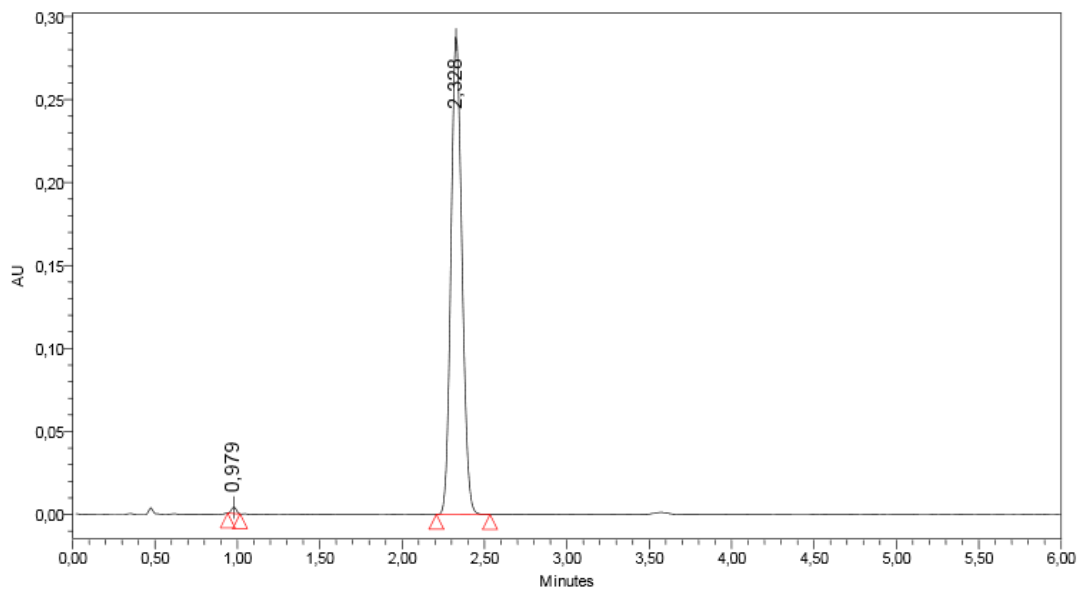

Column: Lux Cellulose-5 (3  $\mu\text{m}$ , 150 $\times$ 4.6 mm), mobile phase: 25% ethanol in  $\text{CO}_2$ , back pressure: 120 bar, temperature: 40  $^\circ\text{C}$ , flow rate: 3.5 ml/min and wavelength: 220 nm.  
Diastereomeric ratio: >99/1. Enantiomeric excess: 98.8%.

(*R,R*)-8

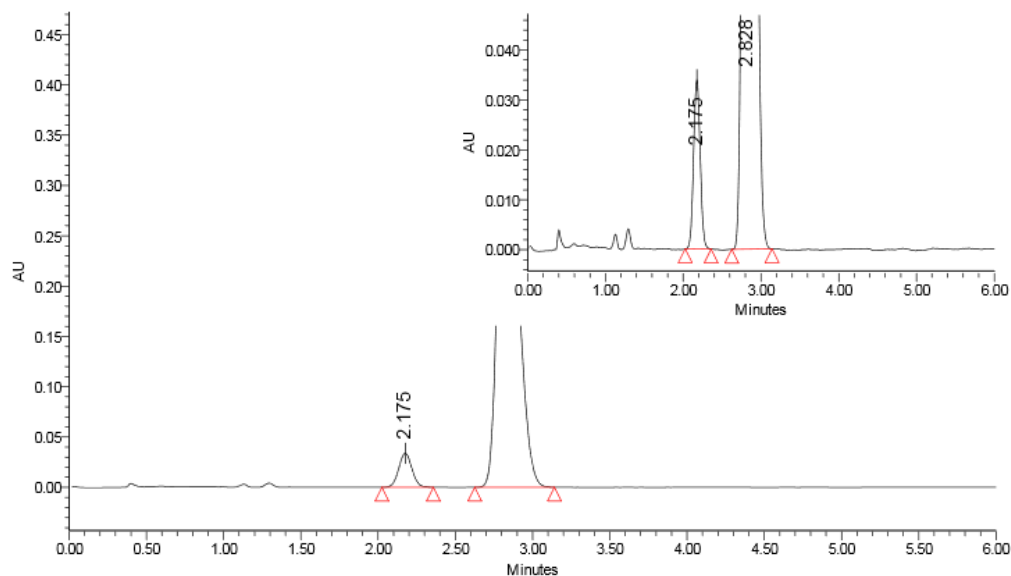

Column: Lux Amylose-1 (3  $\mu$ m, 150 $\times$ 4.6 mm), mobile phase: 10% ethanol in CO<sub>2</sub>, back pressure: 120 bar, temperature: 40  $^{\circ}$ C, flow rate: 3.5 ml/min and wavelength: 220 nm.  
Diastereomeric ratio: >99/1. Enantiomeric excess: 89.8%

(*S,R*)-8

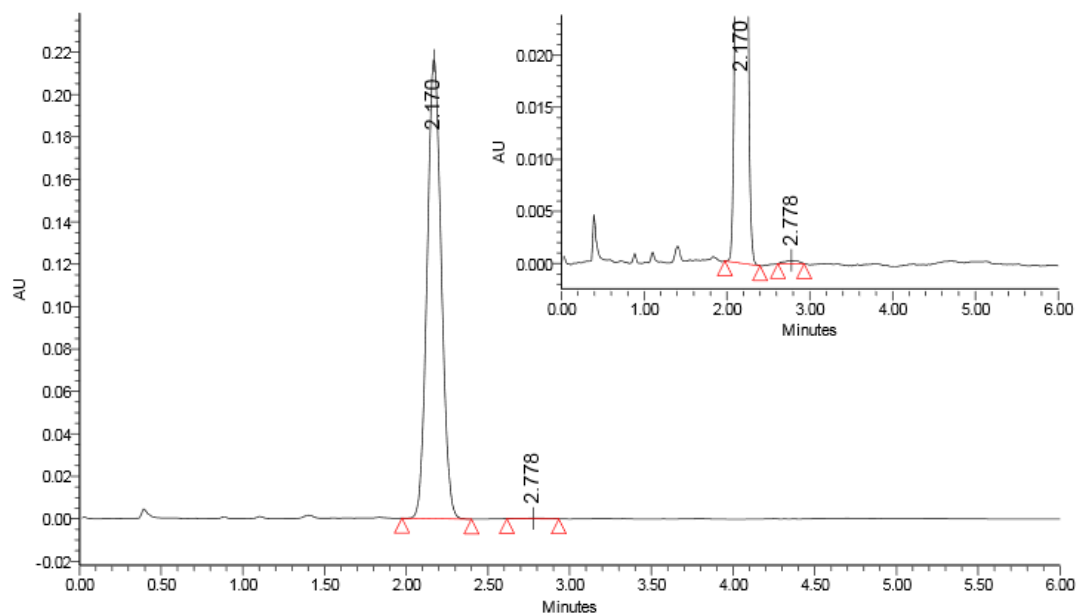

Column: Lux Amylose-1 (3  $\mu$ m, 150 $\times$ 4.6 mm), mobile phase: 10% ethanol in CO<sub>2</sub>, back pressure: 120 bar, temperature: 40  $^{\circ}$ C, flow rate: 3.5 ml/min and wavelength: 220 nm.  
Diastereomeric ratio: >99/1. Enantiomeric excess: 99.4%



# <sup>1</sup>H and <sup>13</sup>C NMR spectra for compounds 2 and 5-11

<sup>1</sup>H NMR (500 MHz, DMSO-d6)

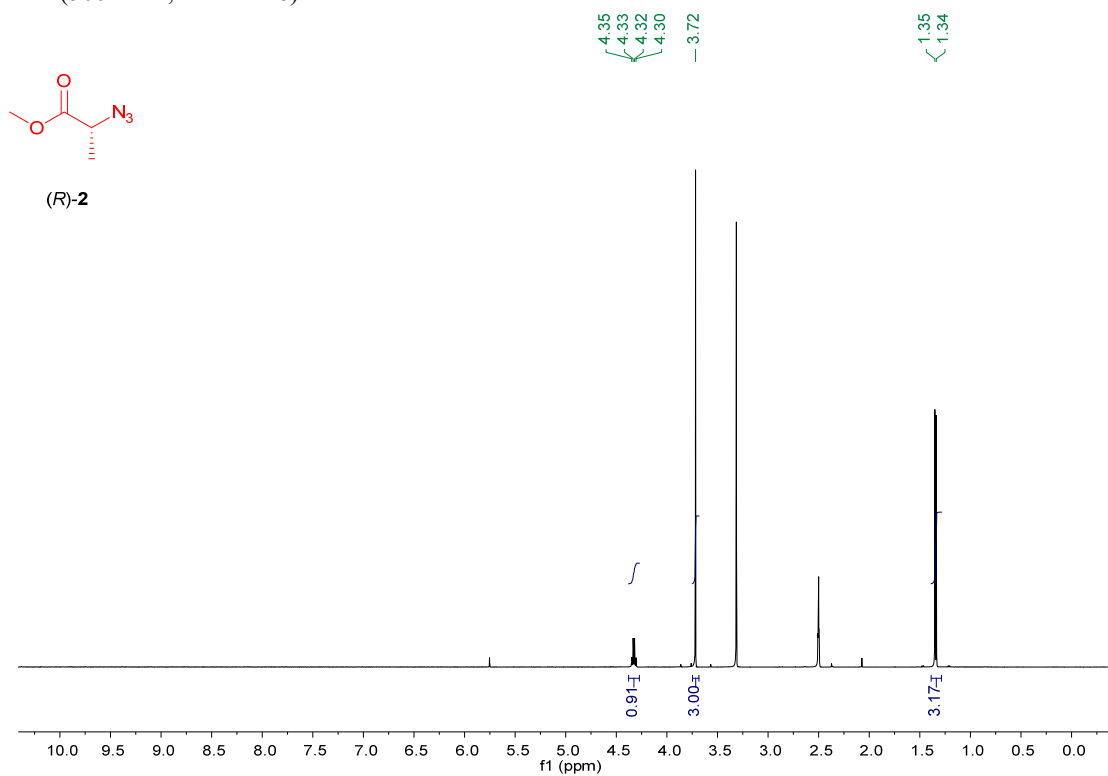

<sup>13</sup>C NMR (126 MHz, DMSO-d6)

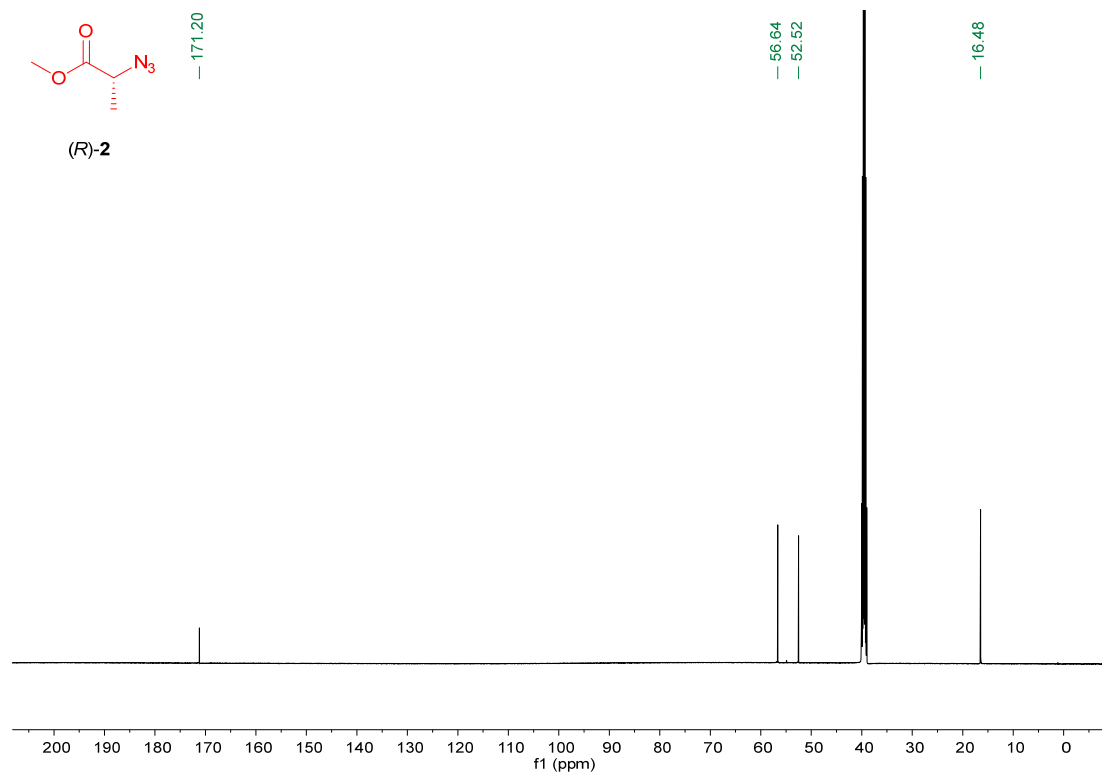

<sup>1</sup>H NMR (500 MHz, DMSO-d<sub>6</sub>)

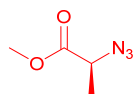

(S)-2

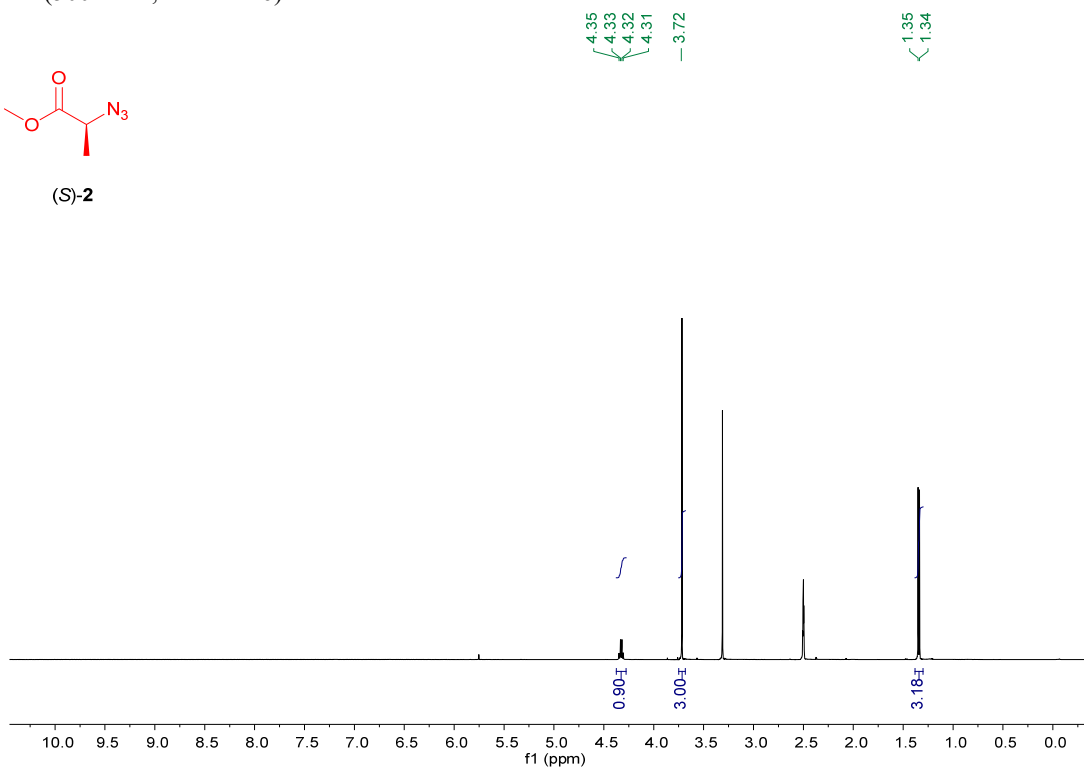

<sup>13</sup>C NMR (126 MHz, DMSO-d<sub>6</sub>)

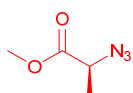

(S)-2

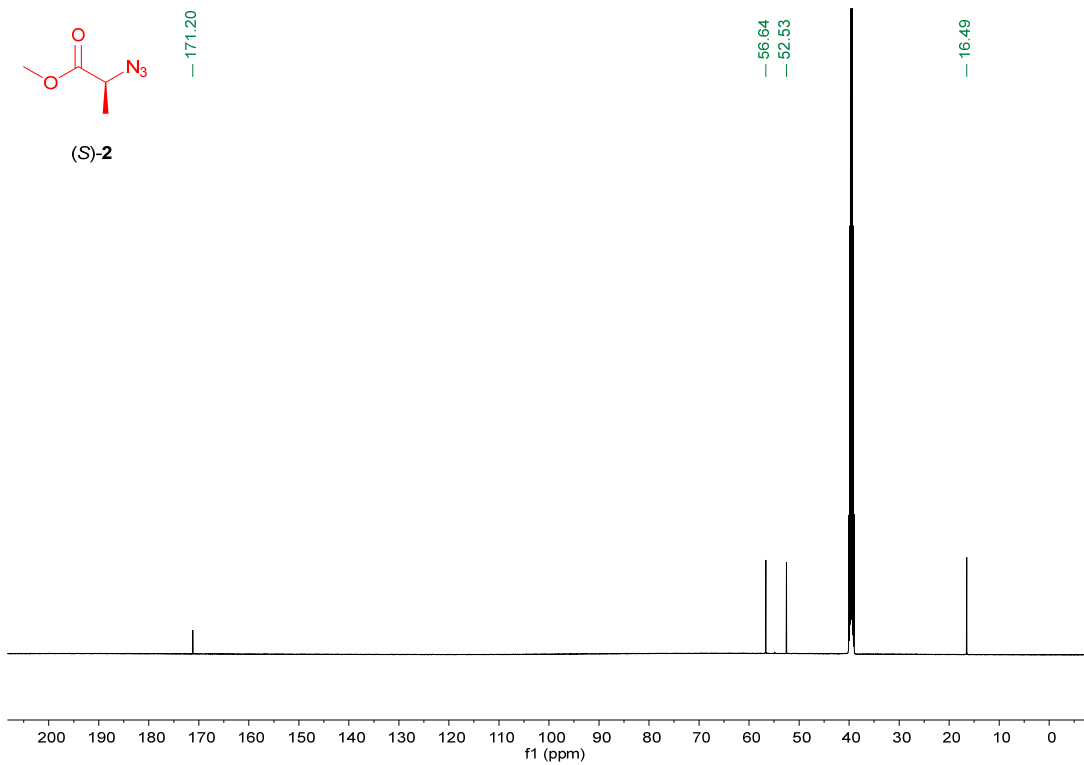

<sup>1</sup>H NMR (400 MHz, CDCl<sub>3</sub>)

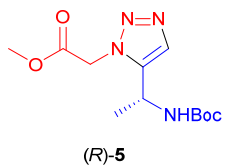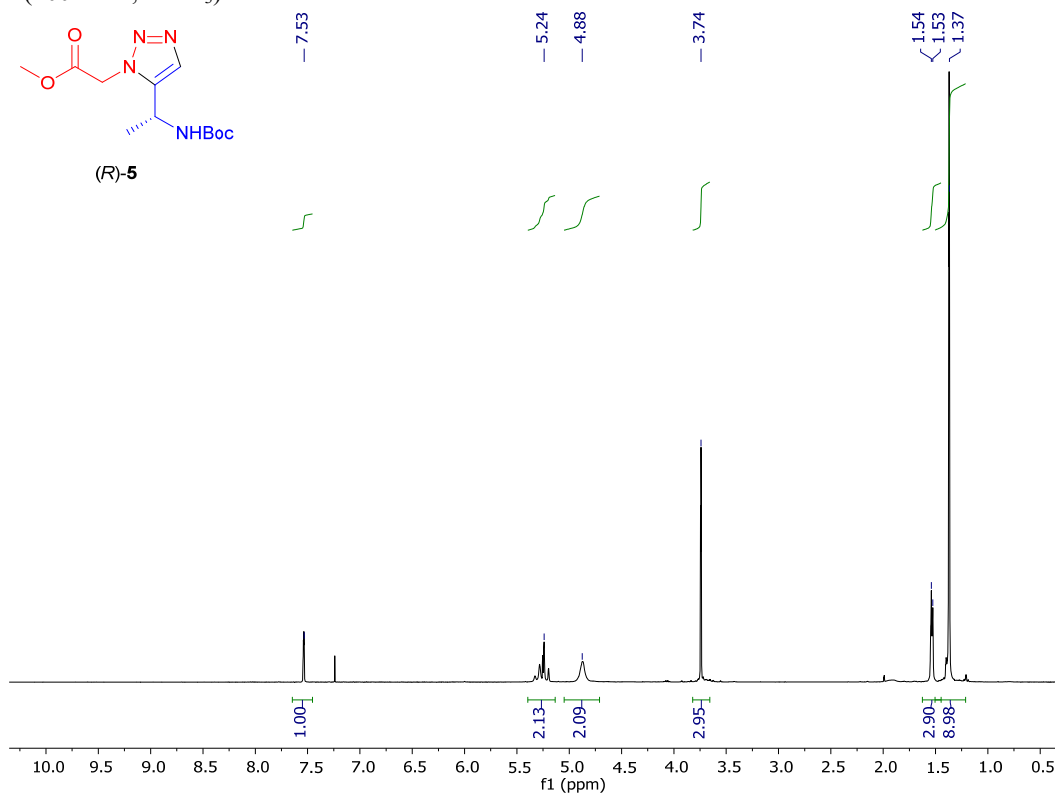

<sup>13</sup>C NMR (101 MHz, CDCl<sub>3</sub>)

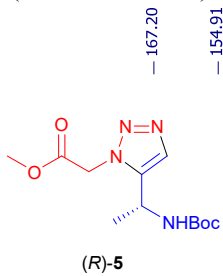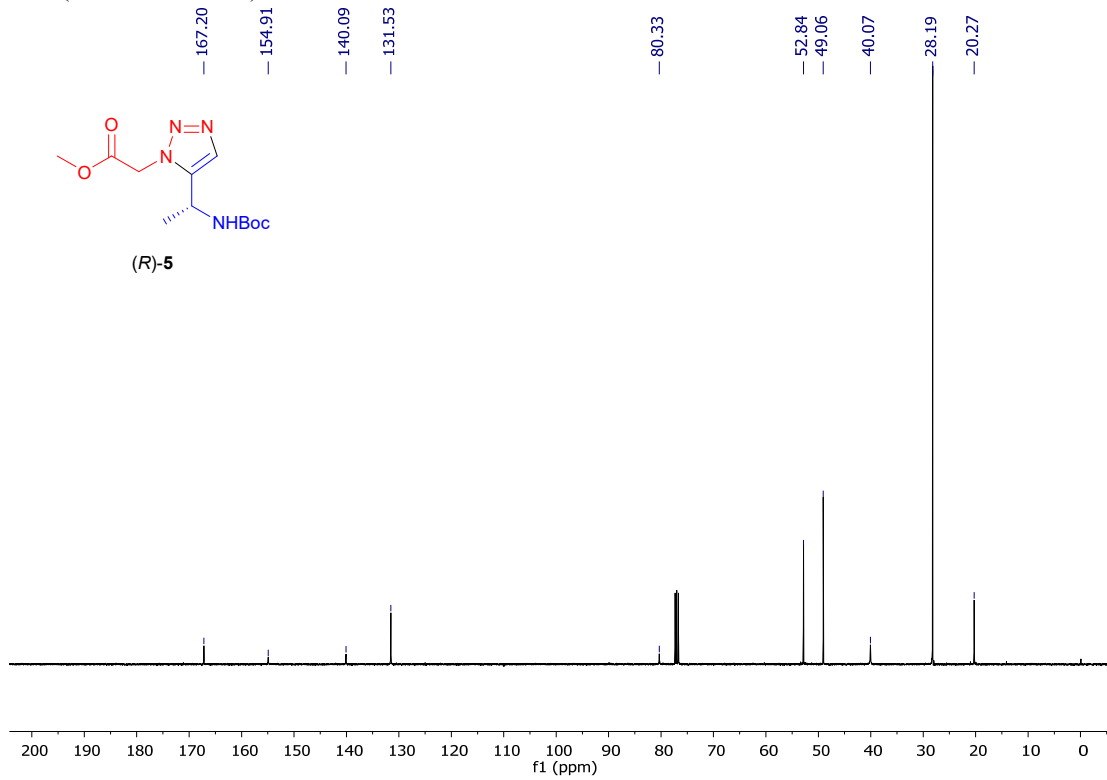

<sup>1</sup>H NMR (400 MHz, CDCl<sub>3</sub>)

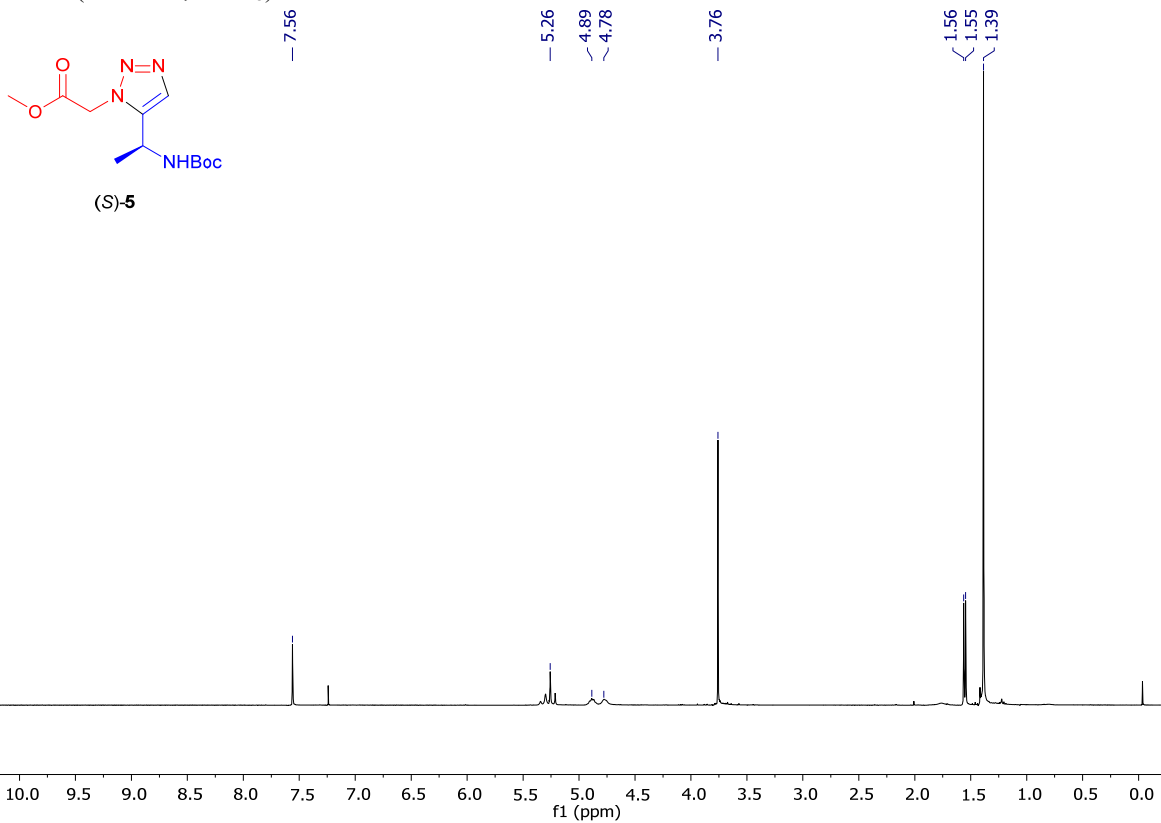

<sup>13</sup>C NMR (101 MHz, CDCl<sub>3</sub>)

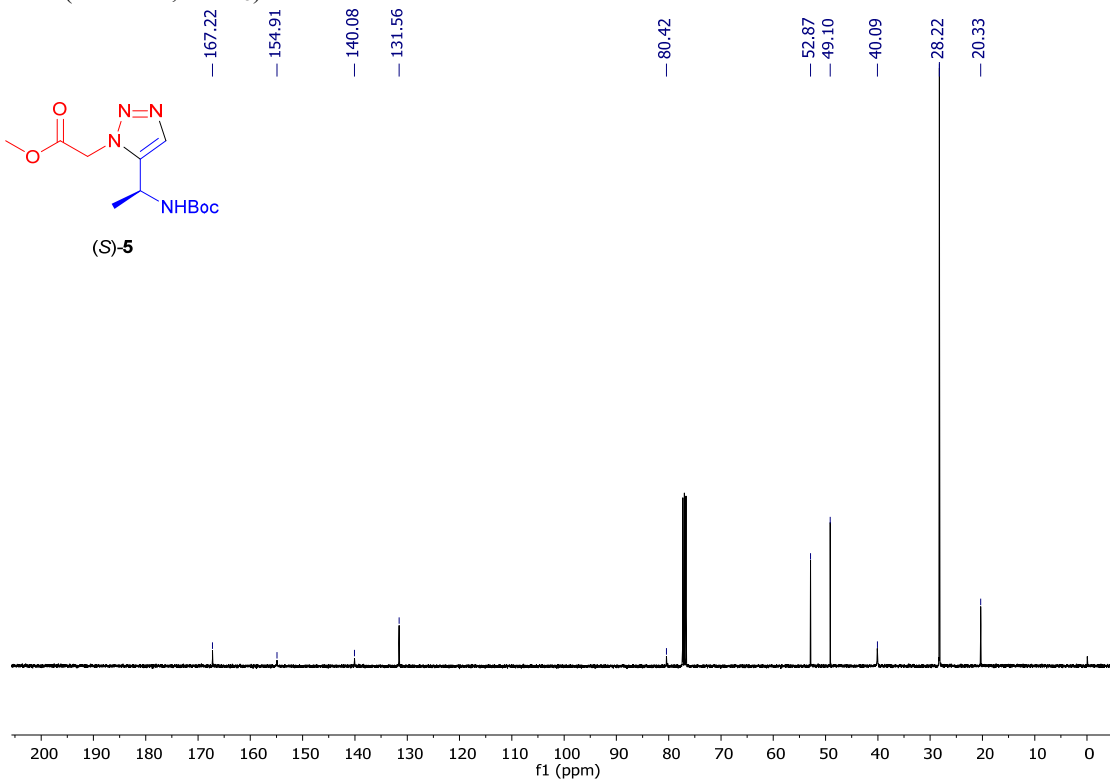

<sup>1</sup>H NMR (500 MHz, DMSO-*d*)

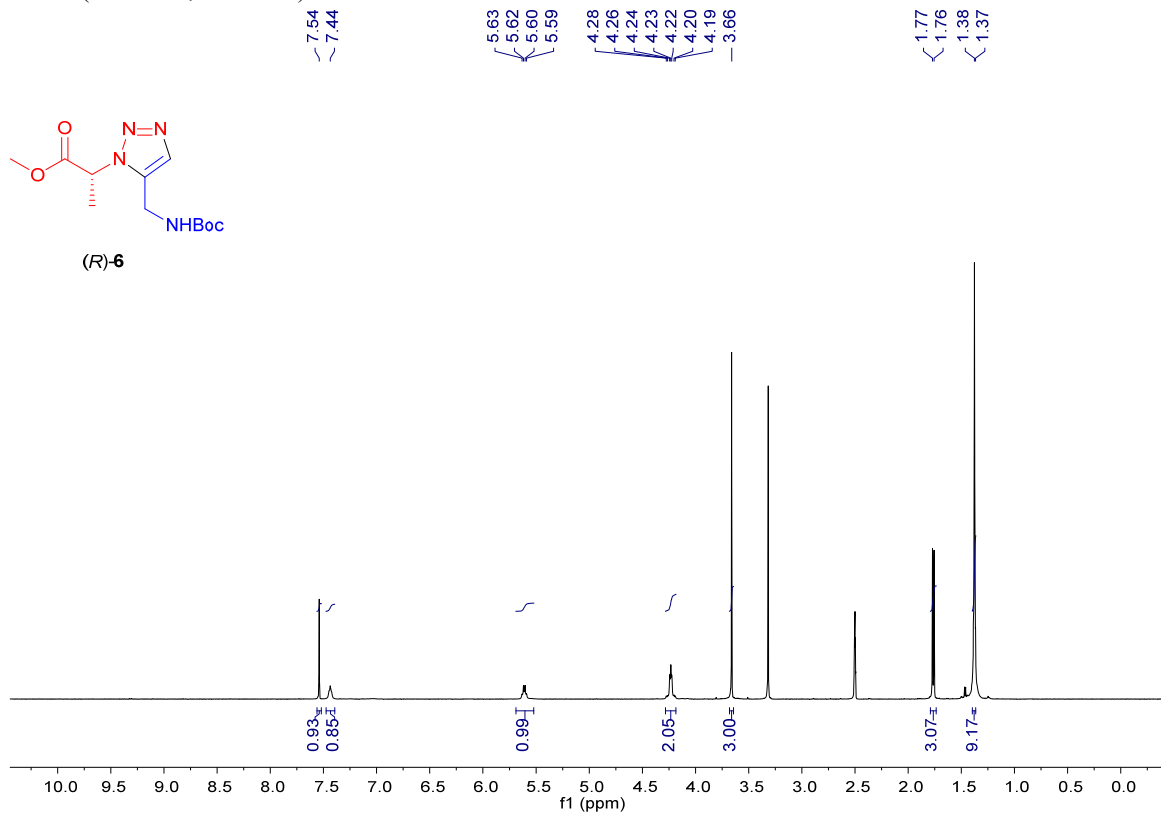

<sup>13</sup>C NMR (126 MHz, DMSO-*d*)

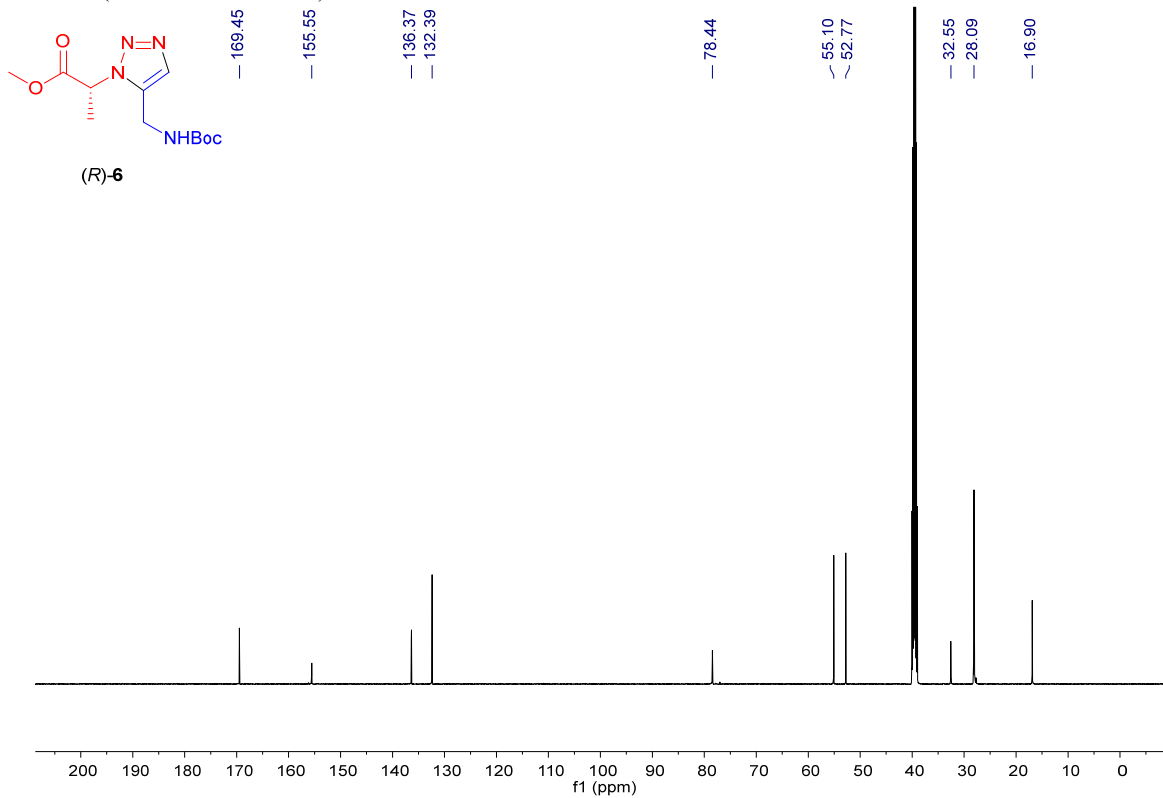

2D NOESY for verification of 1,5-regiochemistry

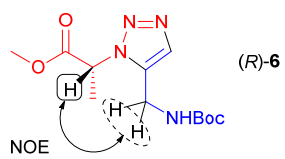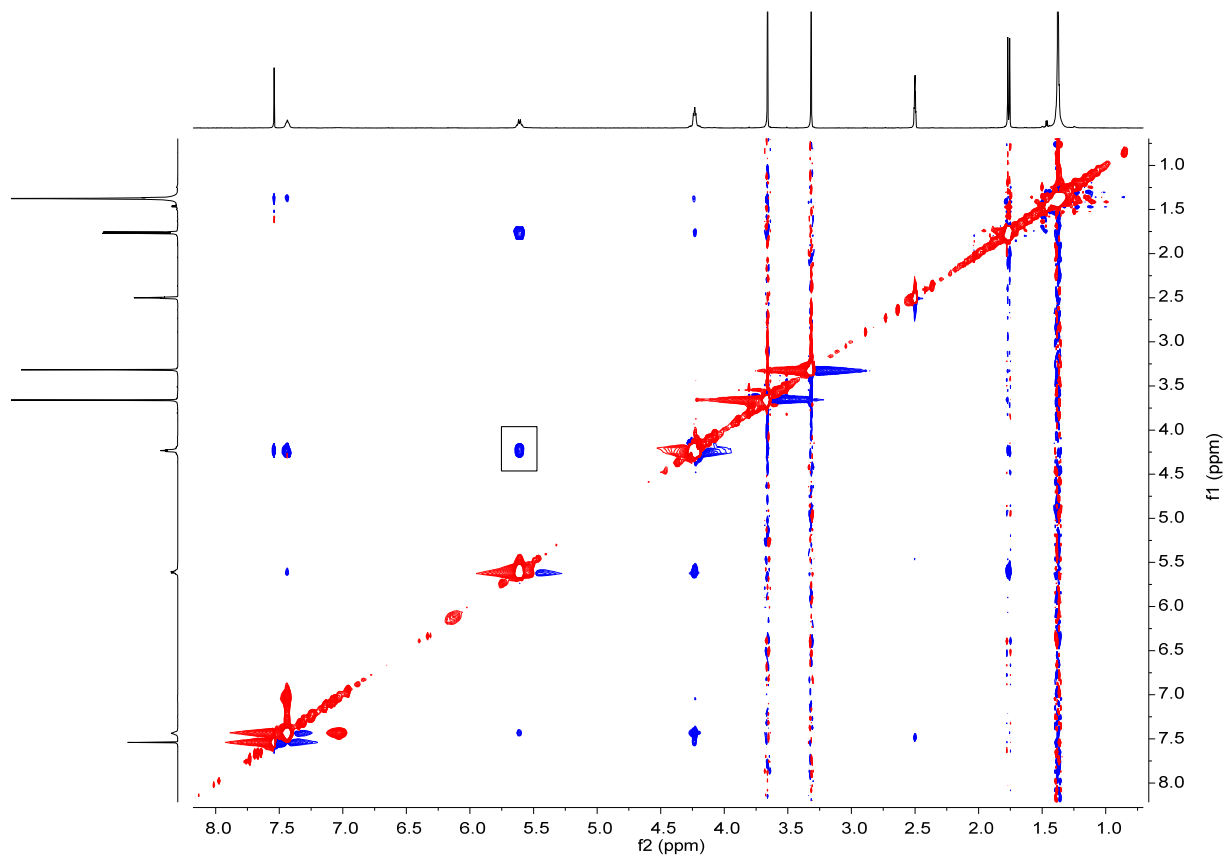

<sup>1</sup>H NMR (400 MHz, CDCl<sub>3</sub>)

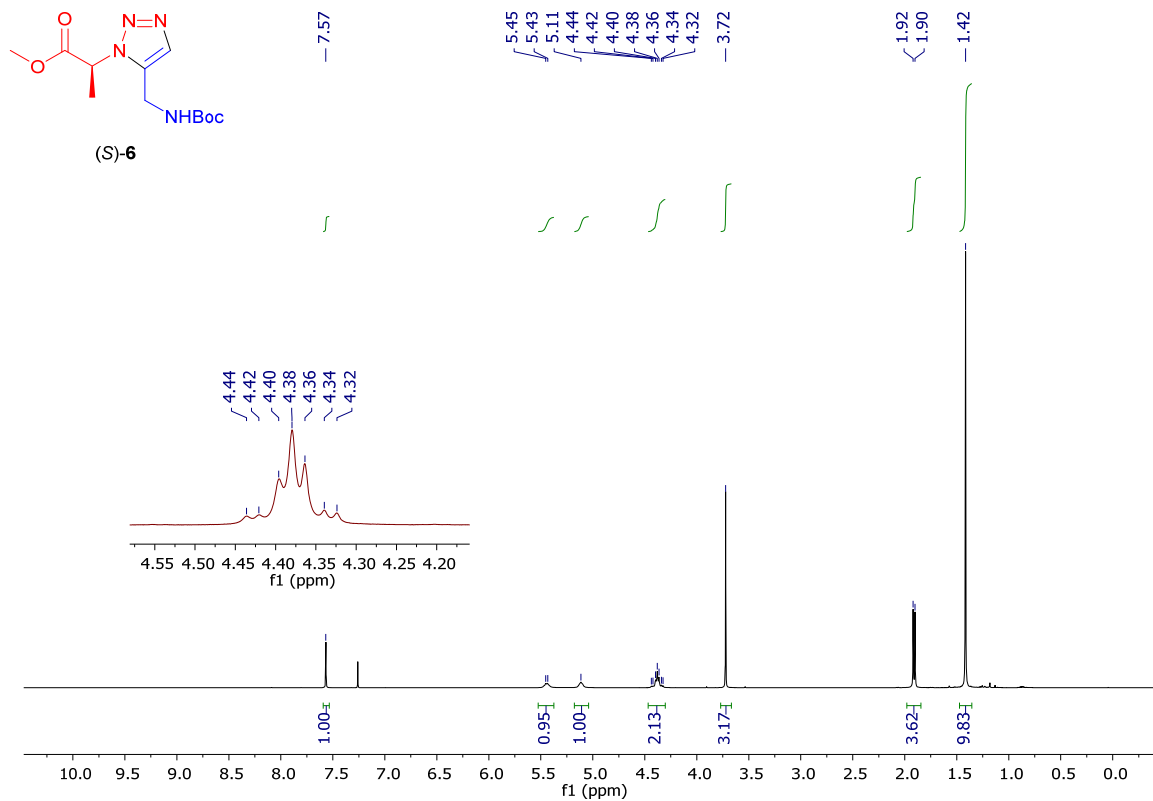

<sup>13</sup>C NMR (101 MHz, CDCl<sub>3</sub>)

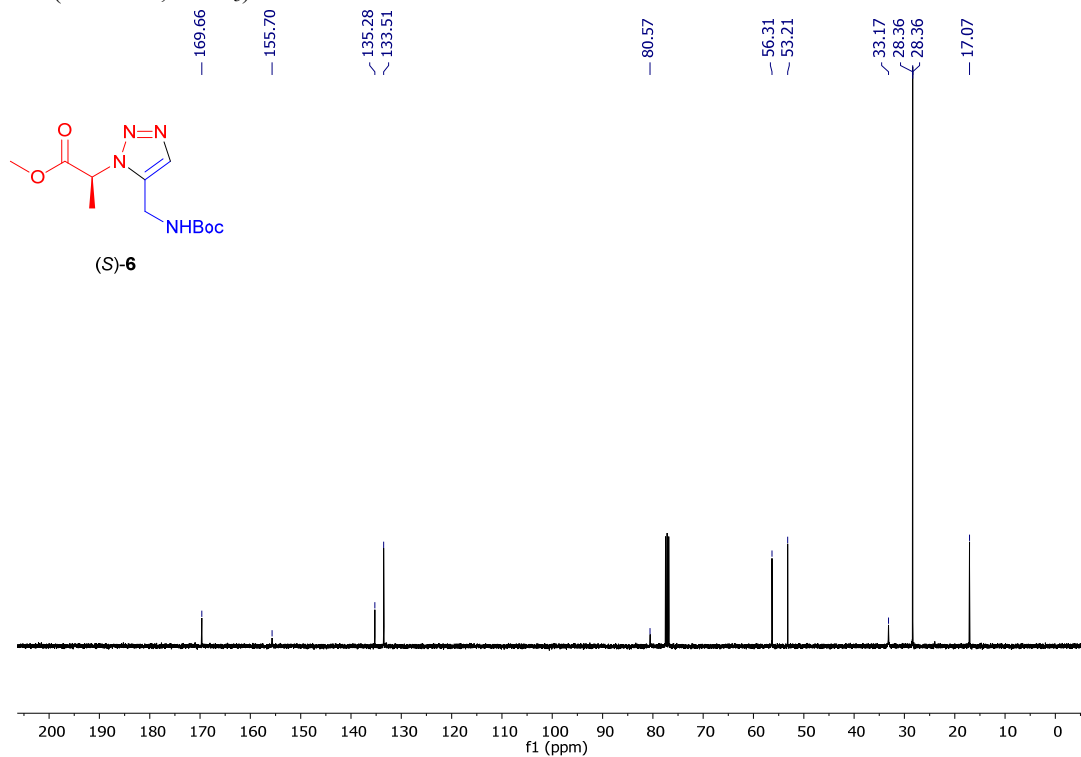

<sup>1</sup>H NMR (400 MHz, CDCl<sub>3</sub>)

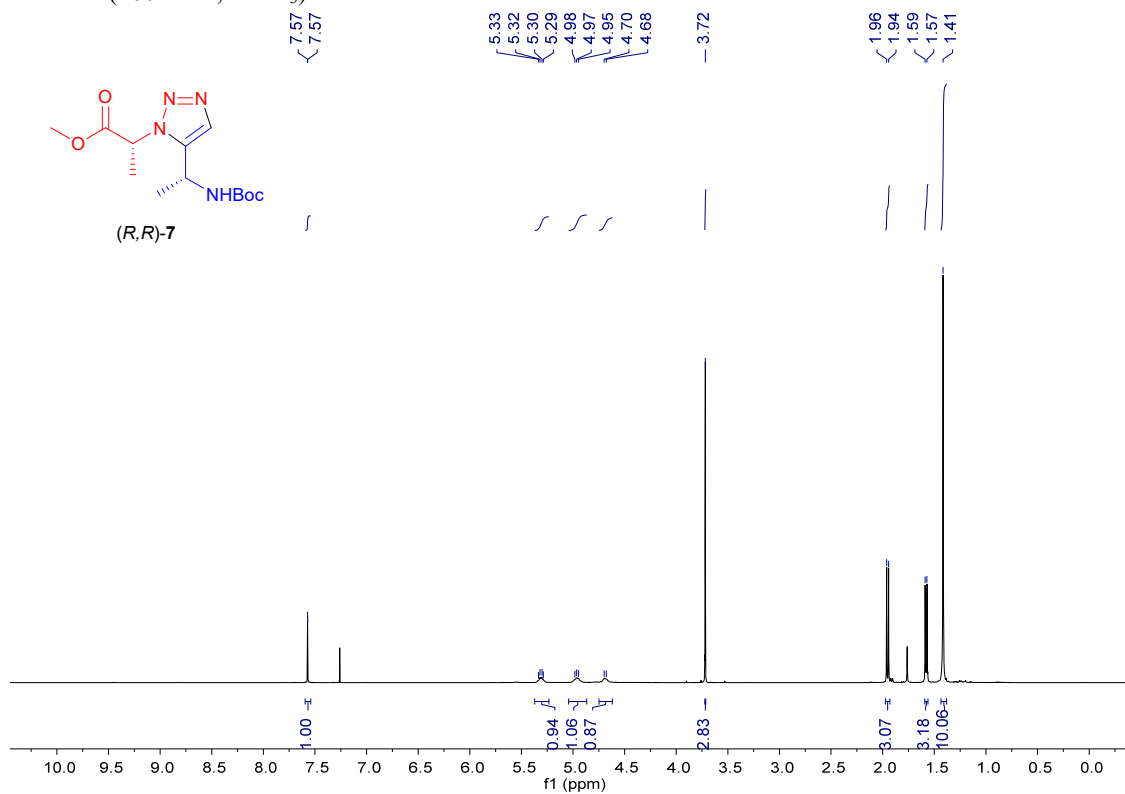

<sup>13</sup>C NMR (110 MHz, CDCl<sub>3</sub>)

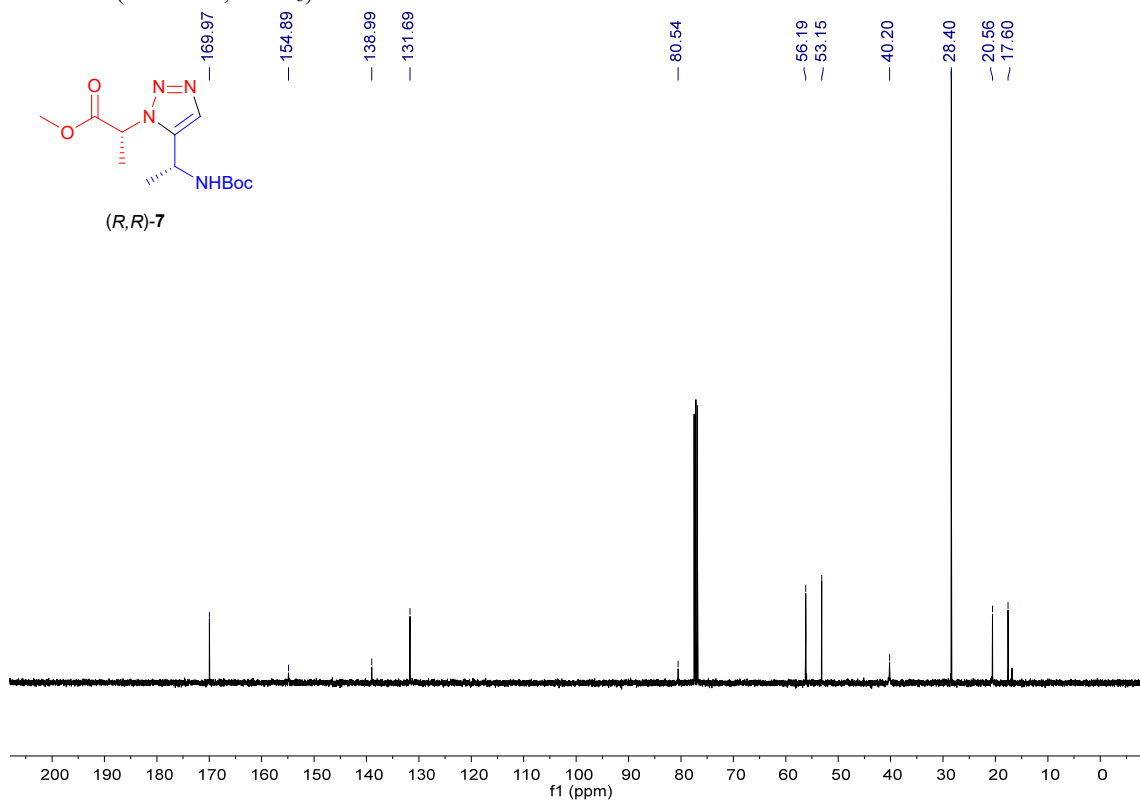



<sup>1</sup>H NMR (400 MHz, CDCl<sub>3</sub>)

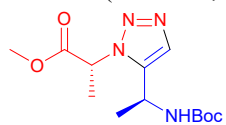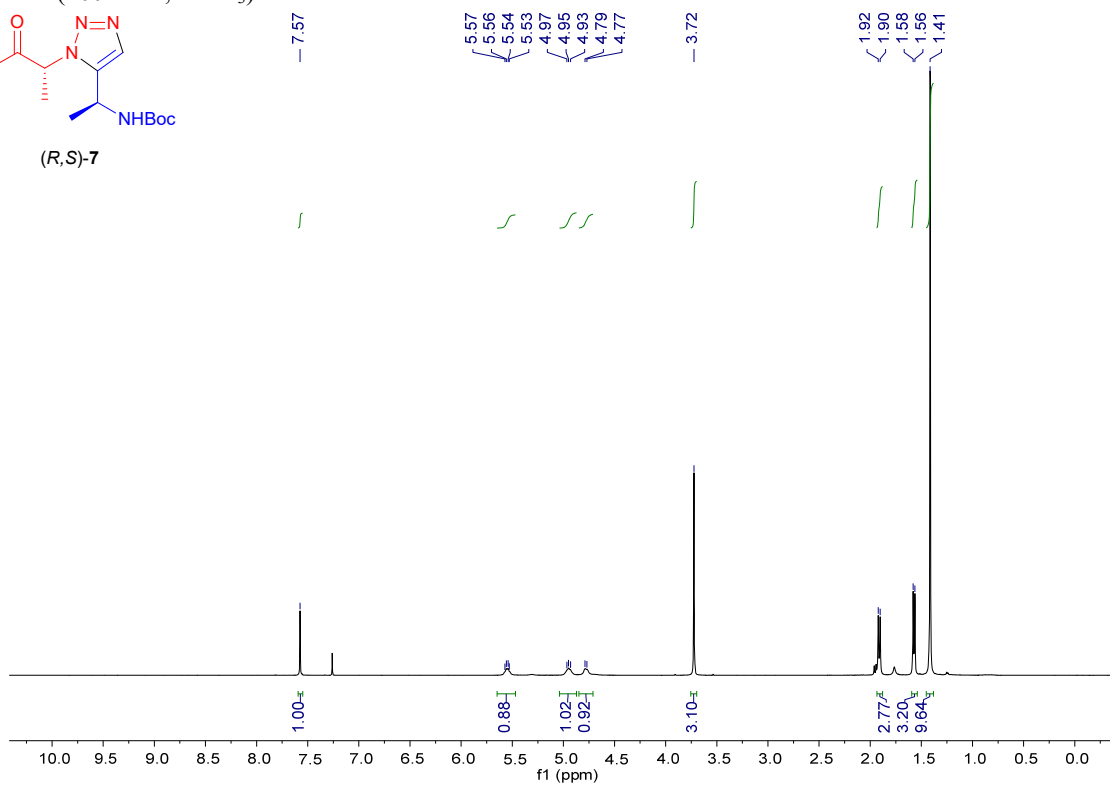

<sup>13</sup>C NMR (101 MHz, CDCl<sub>3</sub>)

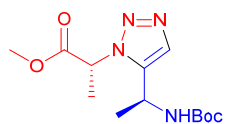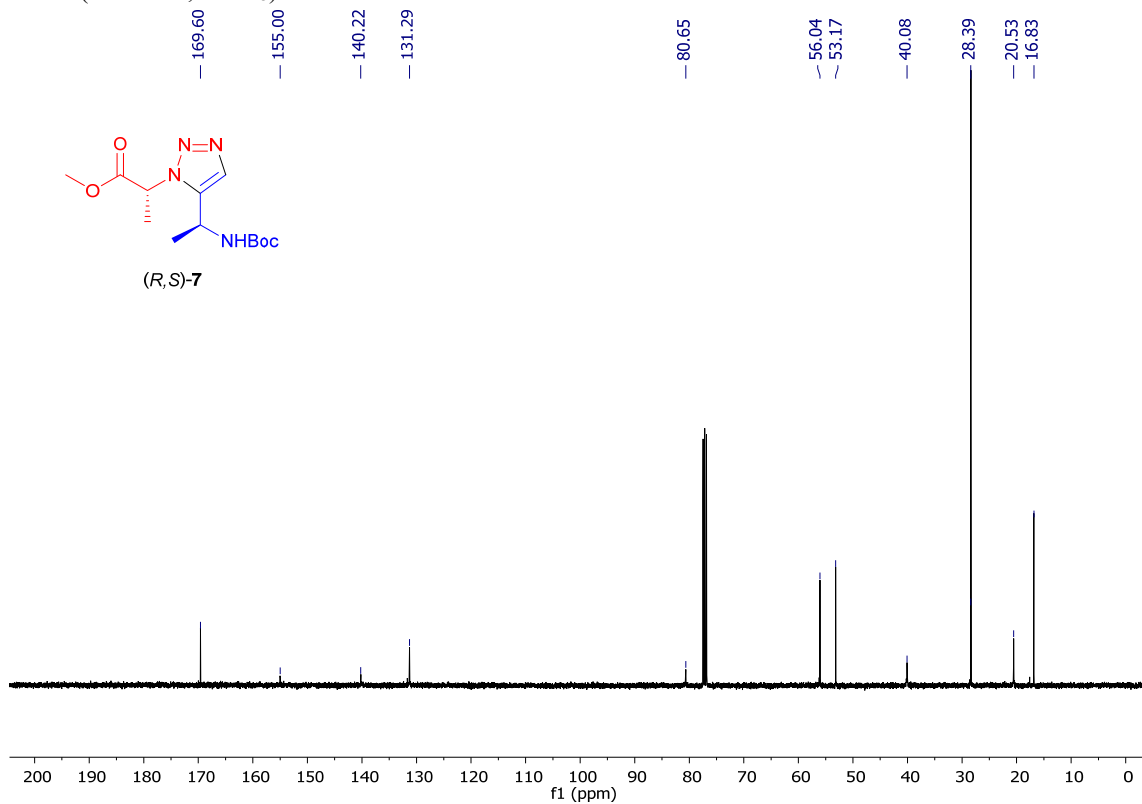

$^1\text{H}$  NMR (400 MHz,  $\text{CDCl}_3$ )

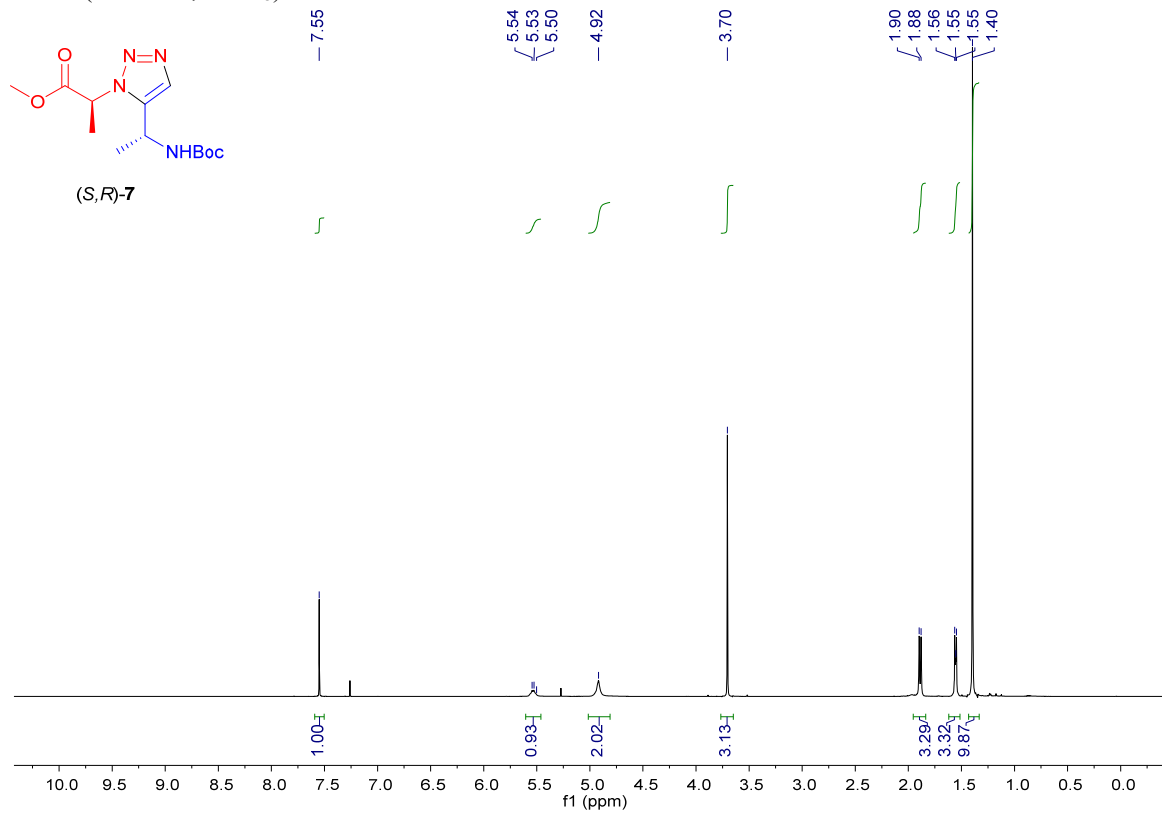

$^{13}\text{C}$  NMR (101 MHz,  $\text{CDCl}_3$ )

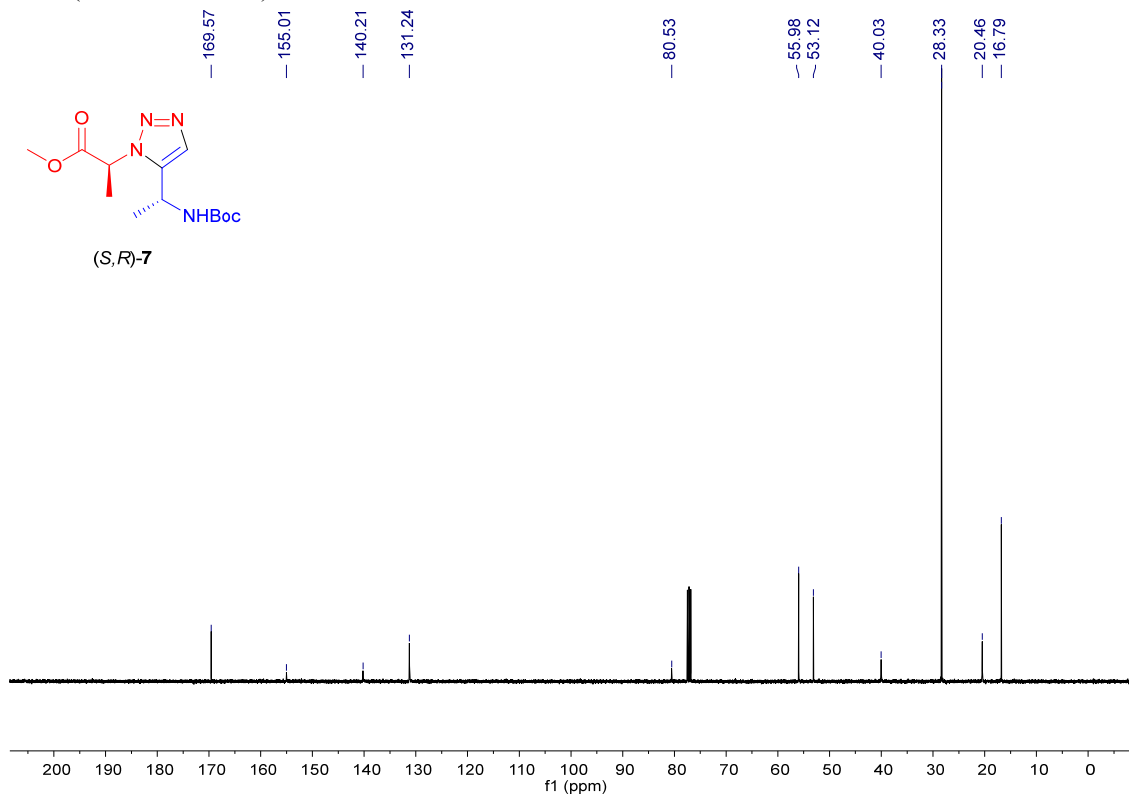

$^1\text{H}$  NMR (400 MHz,  $\text{CDCl}_3$ )

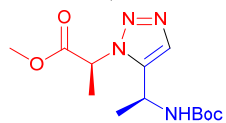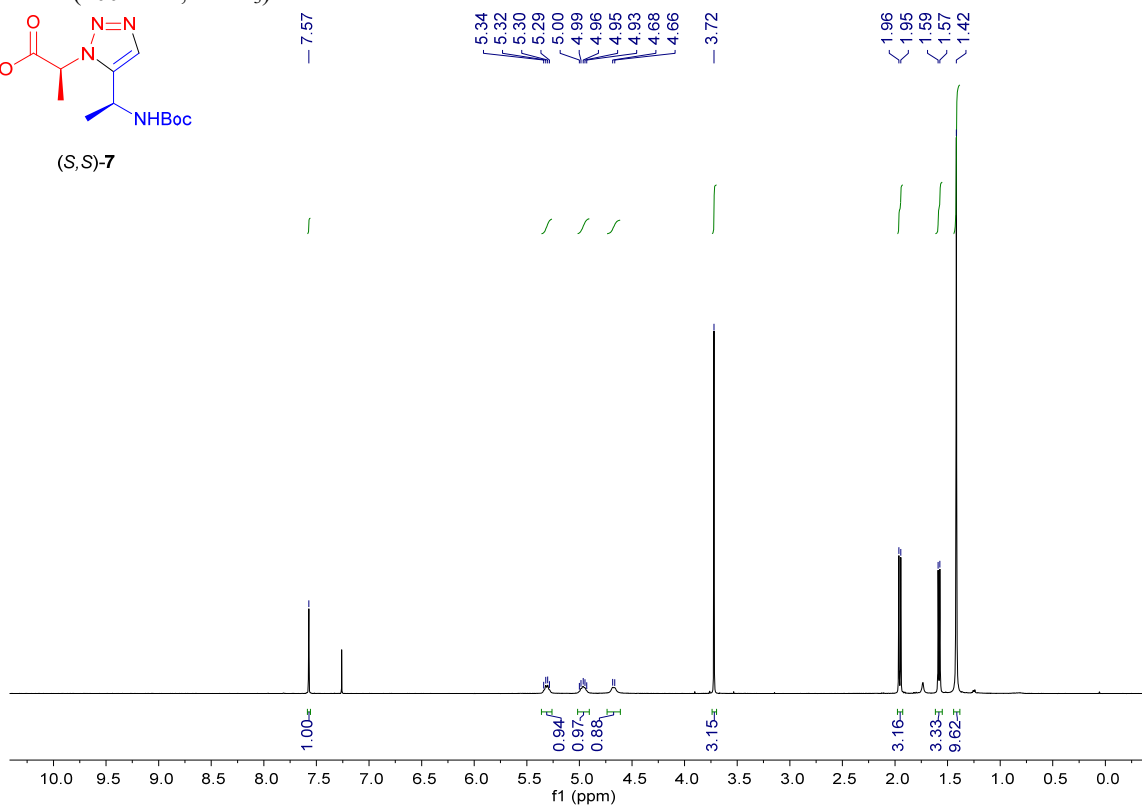

$^{13}\text{C}$  NMR (100 MHz,  $\text{CDCl}_3$ )

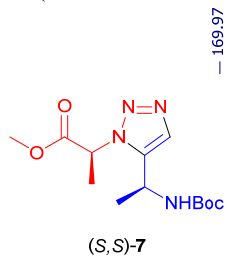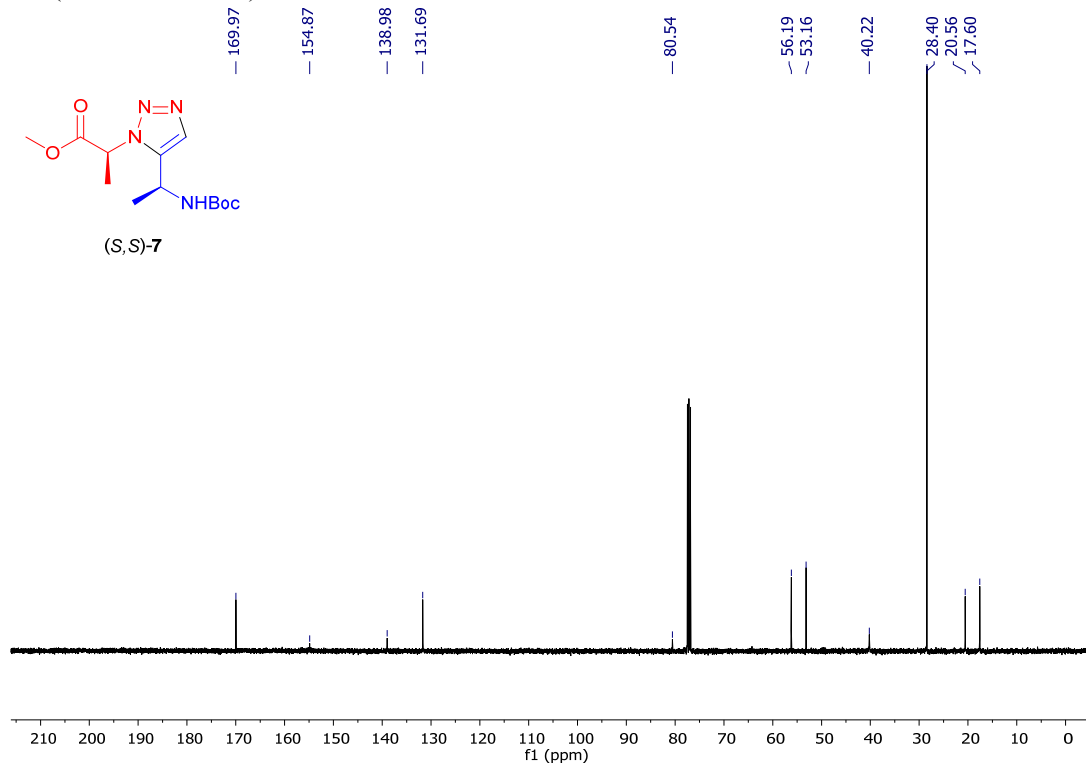

$^1\text{H}$  NMR (400 MHz,  $\text{CDCl}_3$ )

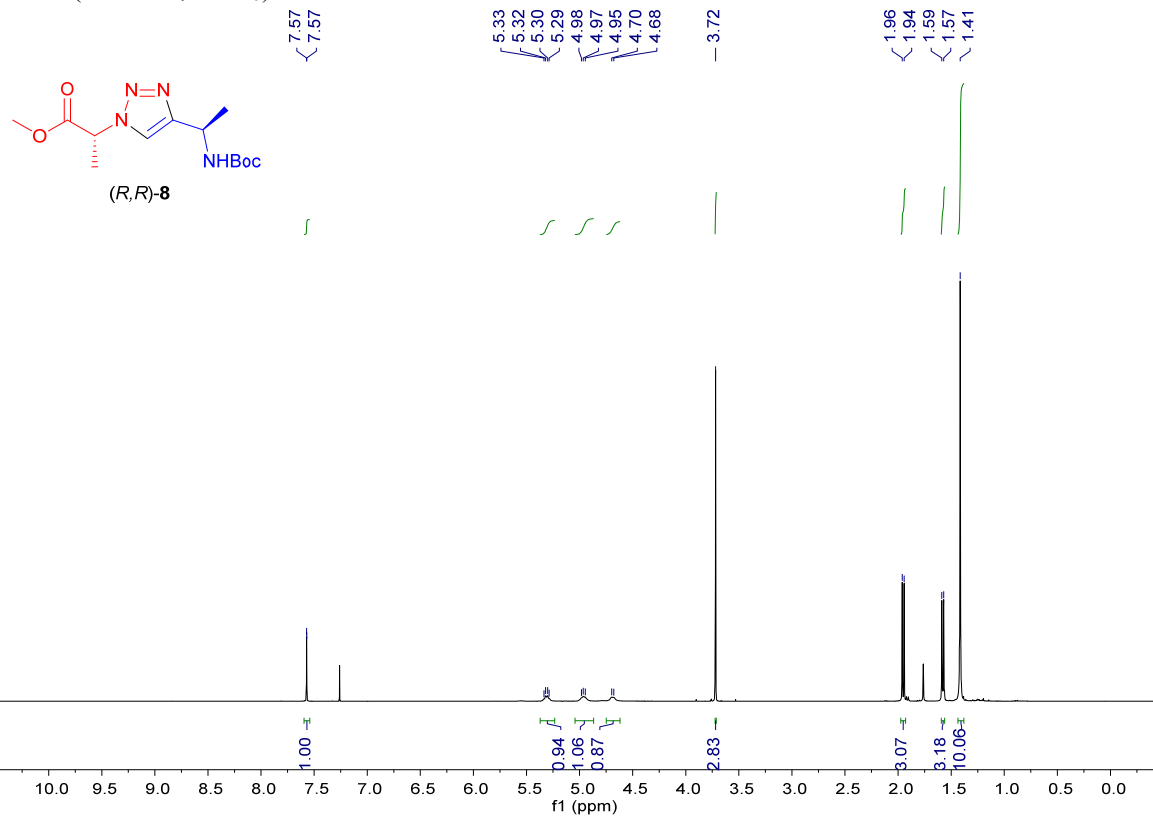

$^{13}\text{C}$  NMR (101 MHz,  $\text{CDCl}_3$ )

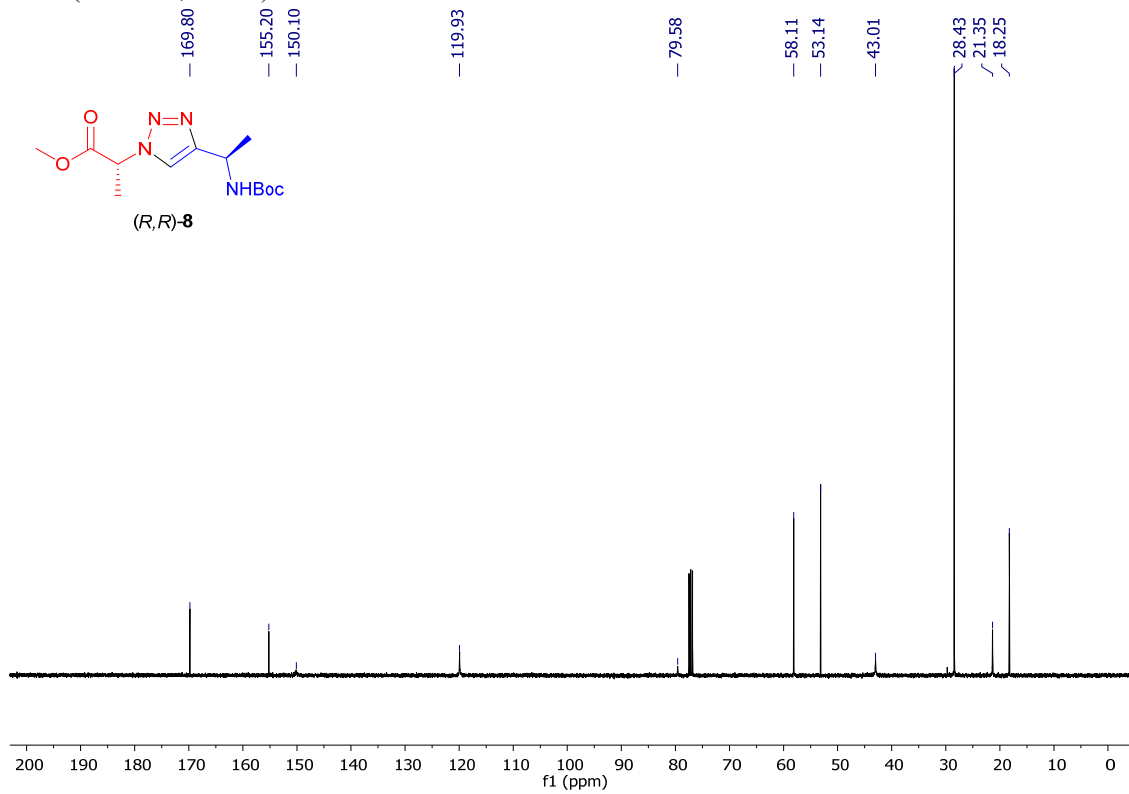

$^1\text{H}$  NMR (400 MHz,  $\text{CDCl}_3$ )

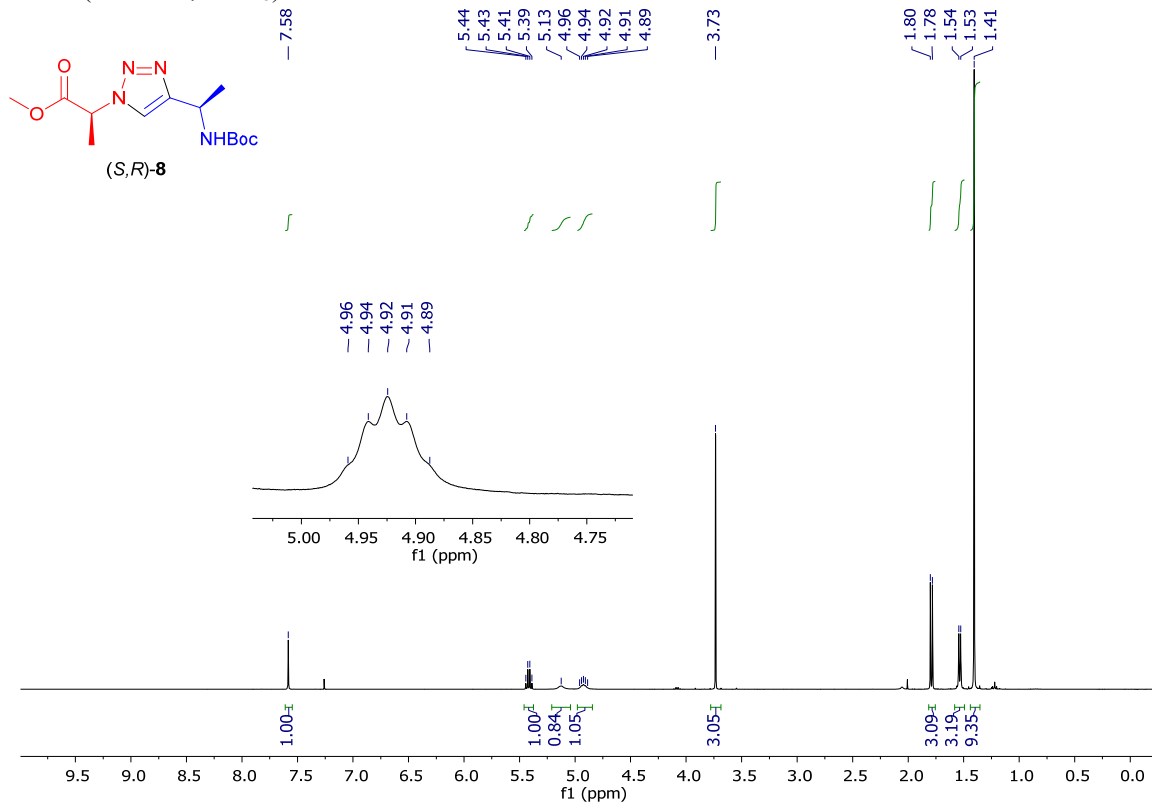

$^{13}\text{C}$  NMR (101 MHz,  $\text{CDCl}_3$ )

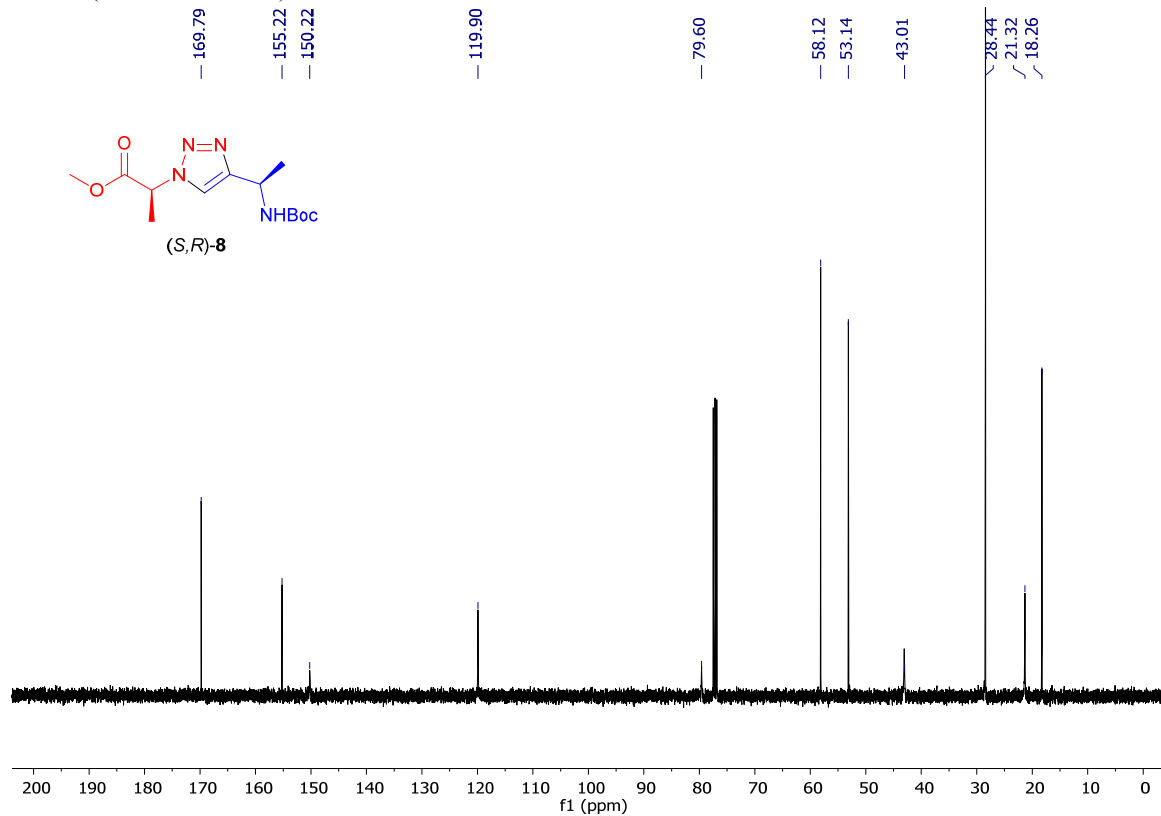

<sup>1</sup>H NMR (400 MHz, CDCl<sub>3</sub>)

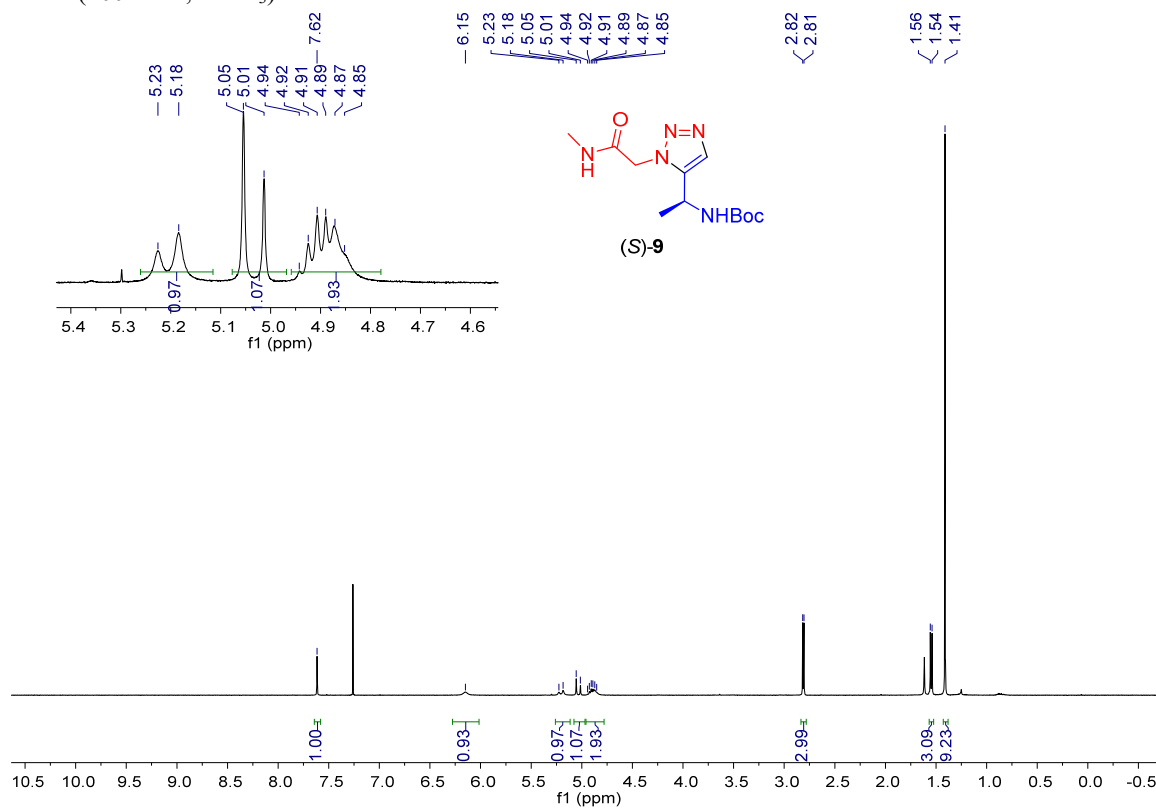

<sup>13</sup>C NMR (101 MHz, CDCl<sub>3</sub>)

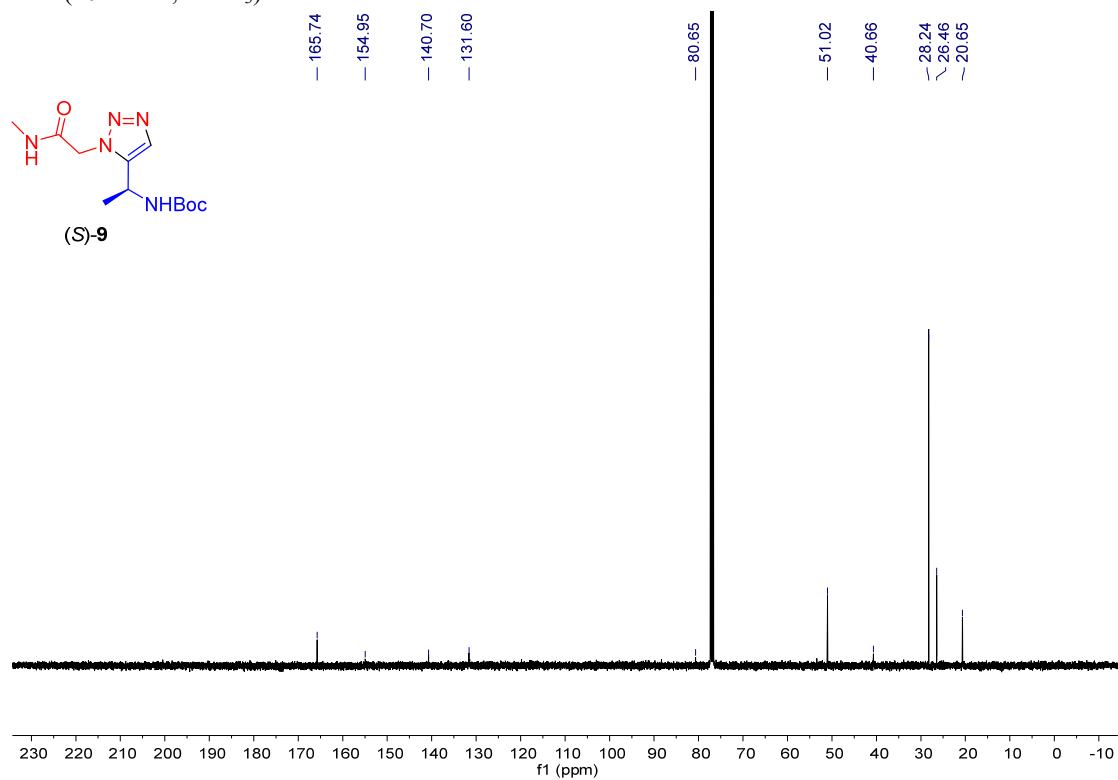

$^1\text{H}$  NMR (400 MHz,  $\text{CDCl}_3$ )

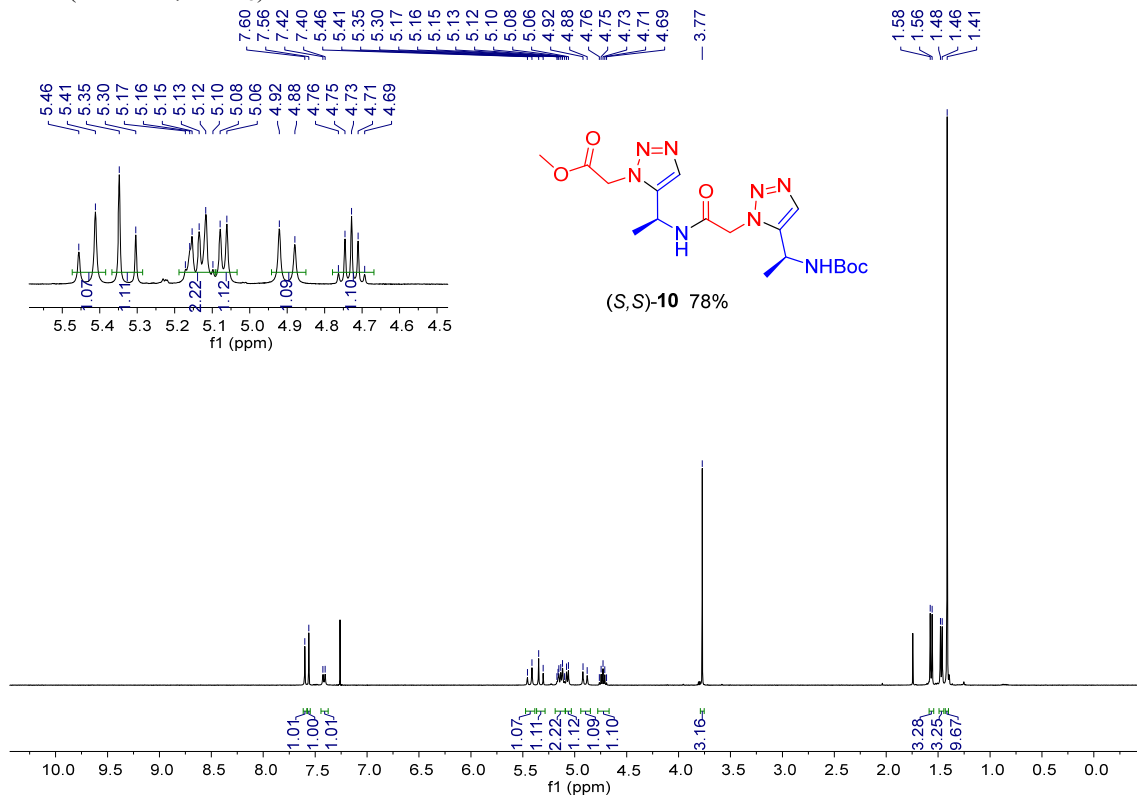

$^{13}\text{C}$  NMR (101 MHz,  $\text{CDCl}_3$ )

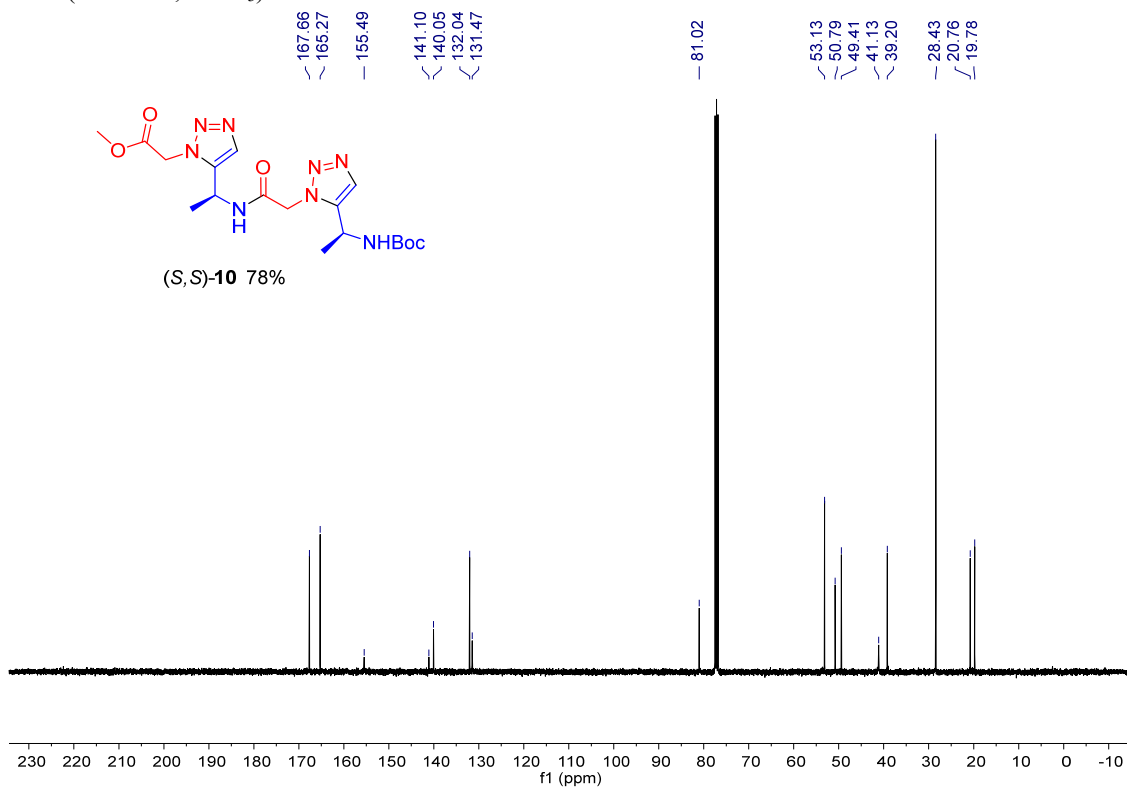

$^1\text{H}$  NMR (400 MHz,  $\text{DMSO-}d_6$ )

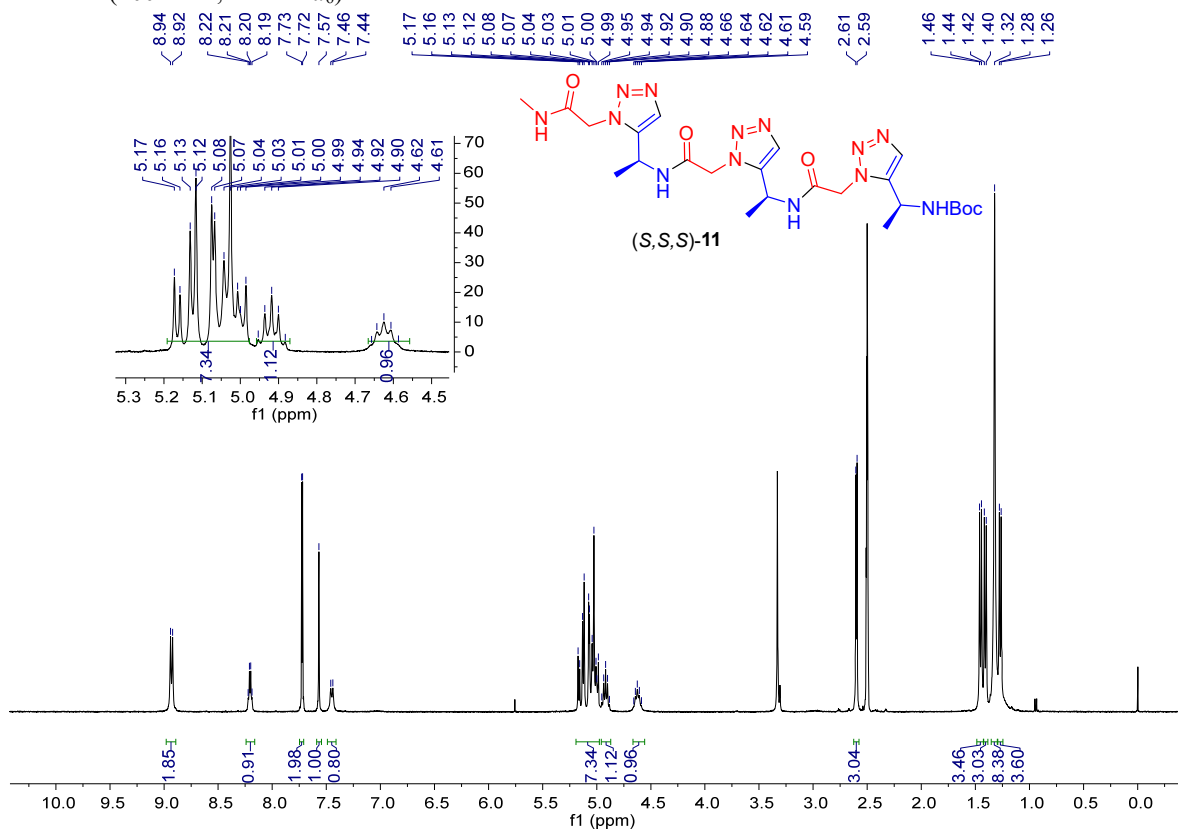

$^{13}\text{C}$  NMR (101 MHz,  $\text{DMSO-}d_6$ )

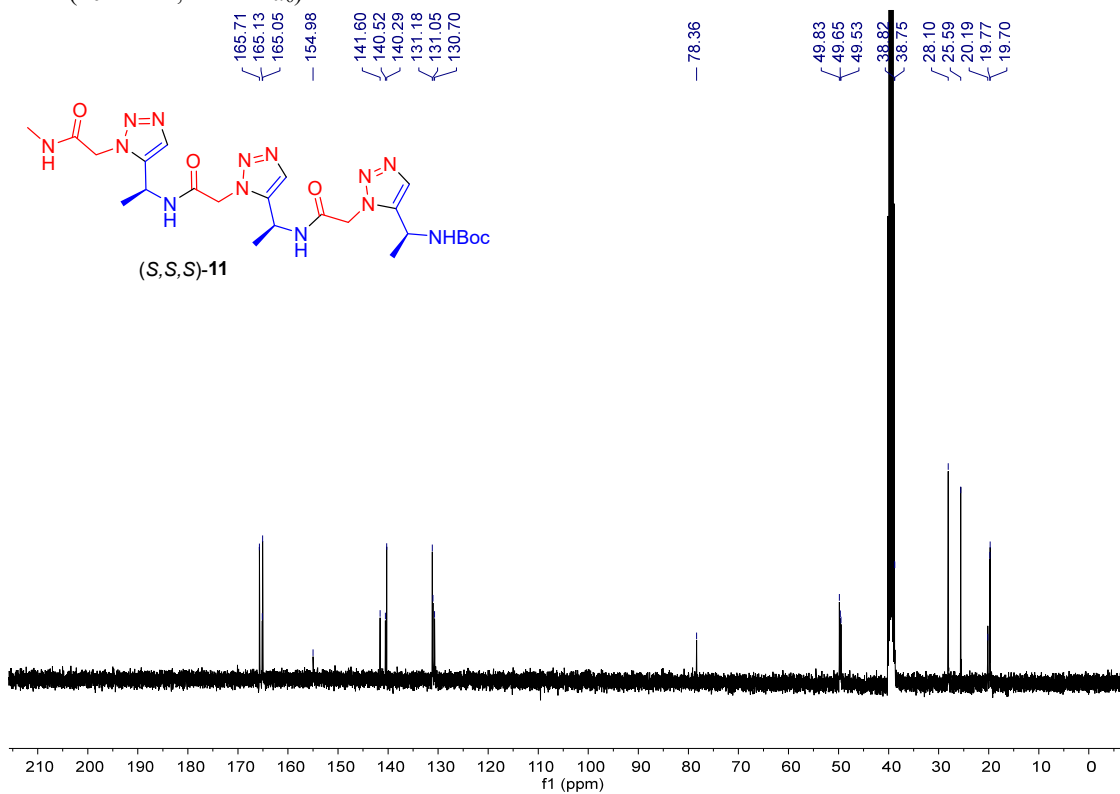



HSQC (500 MHz, DMSO-*d*<sub>6</sub>)

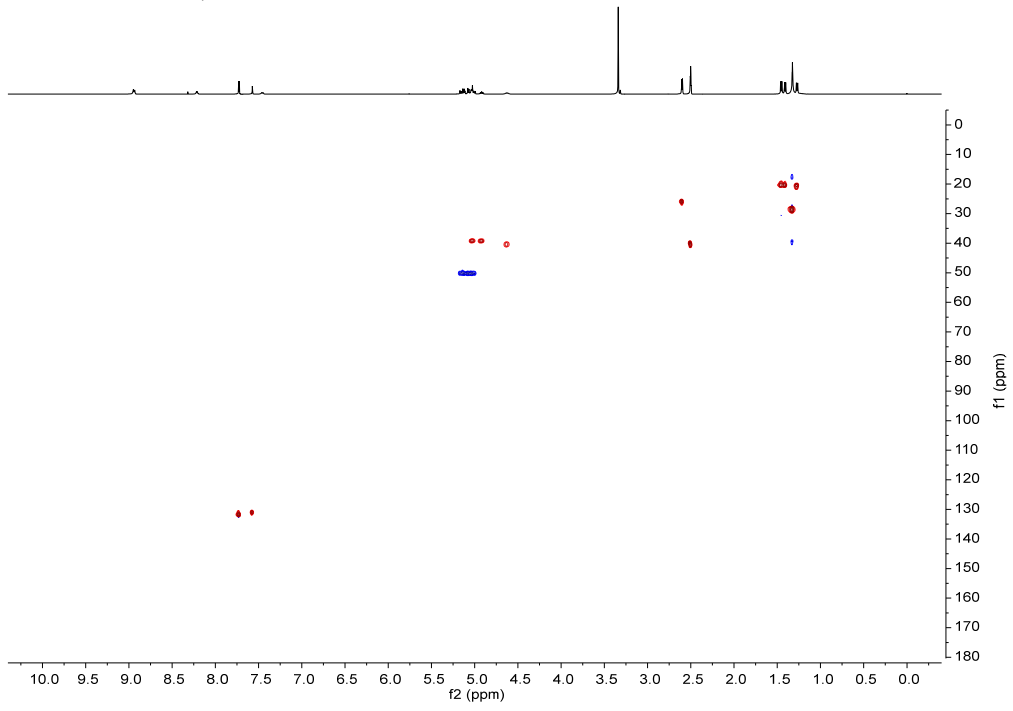

2D NOESY (500 MHz, DMSO-*d*<sub>6</sub>)

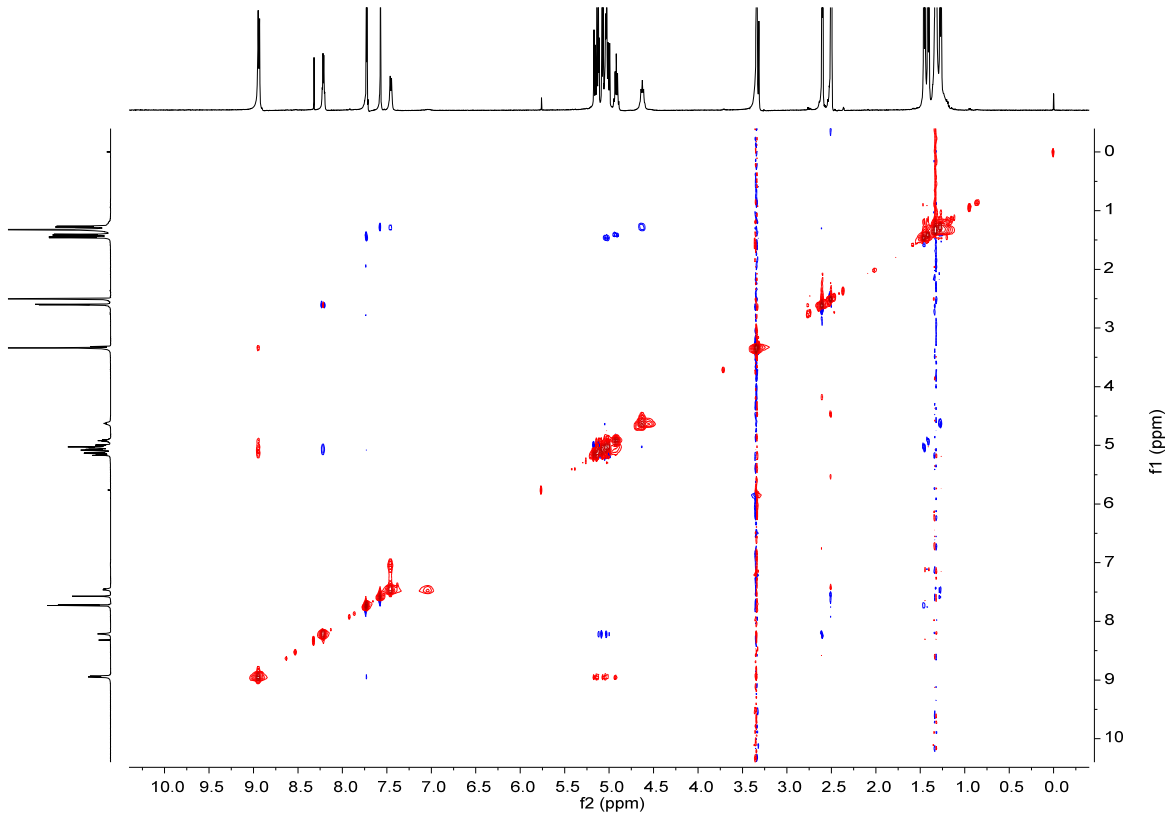

Supplement: d0ob00168f1.pdf [file d0ob00168f1.pdf]
